# Supplementary material
Source: publisher figshare collection journal article supplement (https://acs.figshare.com/ndownloader/files/14934608)

# Supporting Information

## Design of Phosphinic Acid Catalysts with the Closest Stereogenicity at $\alpha$ -Position: Synthesis and Application of $\alpha$ -Stereogenic Perfluoroalkyl Phosphinic Acid Catalysts

Kohei Fujii, Haruki Todani, Shigekazu Ito, and Koichi Mikami\*

[\*] Prof. Dr. K. Mikami, Prof. Dr. S. Ito, K. Fujii, H. Todani  
Department of Chemical Science and Engineering  
School of Materials and Chemical Technology  
Tokyo Institute of Technology  
O-okayama, Meguro-ku, Tokyo 152-8552 (Japan)  
Fax: Int. code (+81)3-5734-2776  
E-mail: mikami.k.ab@m.titech.ac.jp

### Table of Contents

|                               |            |
|-------------------------------|------------|
| General Information .....     | page 2     |
| Experimental Procedures ..... | page 3-16  |
| References .....              | page 17    |
| NMR spectra .....             | page 18-41 |

**General Information:**

$^1\text{H}$ ,  $^{13}\text{C}$ ,  $^{31}\text{P}$  and  $^{19}\text{F}$  NMR spectra were measured on Bruker AV300M (300 MHz) spectrometers. Chemical shifts of  $^1\text{H}$  NMR were expressed in parts per million relative to the singlet ( $\delta = 7.26$ ) for  $\text{CDCl}_3$ , central line of quintet ( $\delta = 2.50$ ) for  $\text{DMSO}-d_6$ . Chemical shifts of  $^{13}\text{C}$  NMR were expressed in parts per million relative to the central line of the triplet ( $\delta = 77.0$ ) for  $\text{CDCl}_3$  central line of the septet ( $\delta = 39.52$ ) for  $\text{DMSO}-d_6$ . Chemical shifts of  $^{31}\text{P}$  NMR were expressed in parts per million downfield from 85%  $\text{H}_3\text{PO}_4$  as an external standard ( $\delta = 0.00$ ) in  $\text{CDCl}_3$ . Chemical shifts of  $^{19}\text{F}$  NMR were expressed in parts per million downfield from BTF as an external standard ( $\delta = -63.24$ ) in  $\text{CDCl}_3$ . Analytical thin layer chromatography (TLC) was performed on glass plates pre-coated with silica-gel (Merck Kieselgel 60 F254, layer thickness 0.25 mm). Visualization was accomplished by UV light (254 nm), anisaldehyde,  $\text{KMnO}_4$ , phosphomolybdic acid and 2,4-dinitrophenylhydrazine. Column chromatography was performed on KANTO Silica Gel 60N (spherical, neutral). IR spectra were measured on a JASCO FT/IR-4200 spectrometer. High performance liquid chromatography (HPLC) was conducted on JASCO PU-980, LG-980-02, DG-980-50, MD-2010, and CO-966 instrument equipped with model UV-975 spectrometers as an ultra violet light. Peak areas were calculated by JASCO chrom NAV (Windows 7) as an automatic integrator. DAICEL CHIRALPAK DAICEL CHIRALCEL OD-3 was used as chiral columns. Mass spectra were measured on a JEOL JMS-T100CS (Accu-TOF) spectrometer. Optical rotations were measured on a JASCO P-1020. All experiments were carried out under argon atmosphere unless otherwise noted.

**Reagents:**

Pyridine (dehydrate), dichloromethane (dehydrate), diethyl ether (dehydrate),  $\text{CCl}_4$ , DMSO (dehydrate), TBME (dehydrate), acetone (dehydrate) MeOH (dehydrate), MeI, acetonitrile (dehydrate) and THF (dehydrate) were purchased from Kanto Chemical Co. Acetylacetone, diisopropylethylamine, indole,  $\text{BF}_3 \cdot (\text{OEt}_2)$ ,  $\text{B}(\text{C}_6\text{F}_5)_3$ ,  $\text{AlEt}_3$ ,  $\text{AlEt}_2\text{Cl}$ ,  $\text{K}_2\text{CO}_3$ , phosphinic acid, oxalyl chloride and NaI were purchased from TCI.  $\text{NiCl}_2(\text{dppp})$ ,  $\text{MeMgBr}$ ,  $\text{TMSCl}$ , Ammonium hypophosphite, Xtalfluor®-E,  $\text{TEA} \cdot 3\text{HF}$ , NFSI, MeLi, NBS, triethylamine and were purchased from Aldrich.  $\text{Ti}(\text{OiPr}_4)_4$ , AIBN,  $\text{AgNO}_3$  and trimethyl orthoformate were purchased from FUJIFILM Wako Pure Chemical Corporation, TBAF (R)-BINOL and  $\text{Tf}_2\text{O}$  were provided from Takasago International Co.  $\text{TMSCF}_3$  and  $\text{C}_2\text{F}_5\text{I}$  was gifted from TOSOH F-TECH, Inc. Chiral phosphoric acid **21**, **22**<sup>1</sup> and *N*-tosylimine **18**<sup>2</sup> was synthesized according to the reported procedure.

## Synthesis of [F<sub>4</sub>]-Phosphinic acid (**8**)

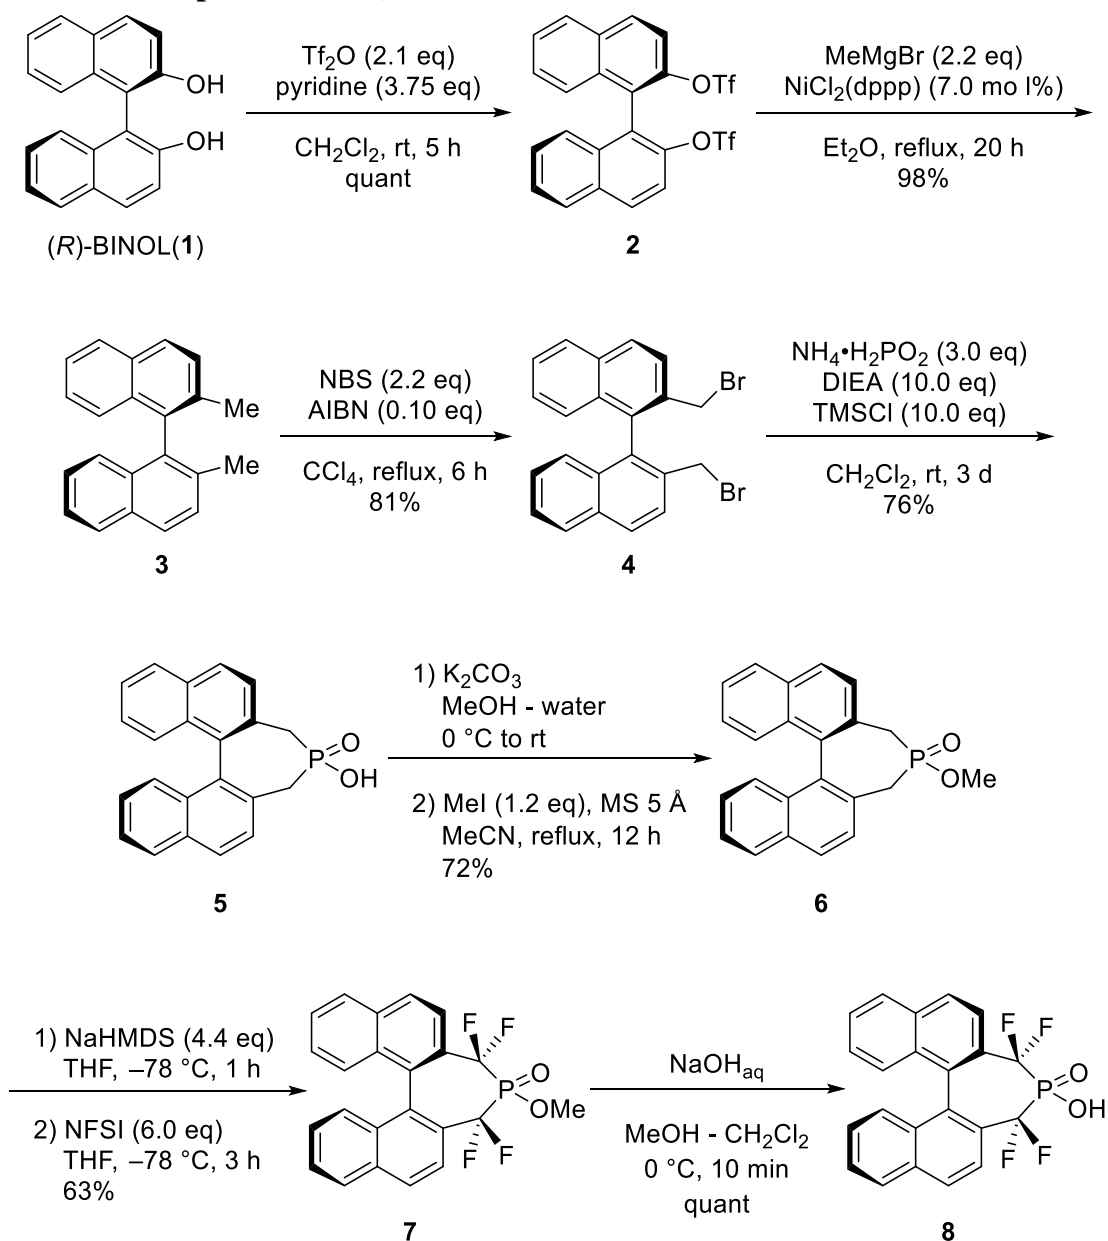

## (*R*)-2,2'-bis(trifluoromethanesulfonyl)-1,1'-binaphthalene (**2**)<sup>3</sup>

To a stirred mixture of (*R*)-BINOL (**1**) (2.86 g, 10 mmol) in dichloromethane (80 mL) were added pyridine (3.0 mL, 37.5 mmol) at room temperature followed by trifluoromethanesulfonyl anhydride (3.5 mL, 21 mmol) upon slow addition at  $0^\circ\text{C}$ . After stirred for 5 h at room temperature, the reaction mixture was quenched with 1 M  $\text{HCl}_{\text{aq}}$  at  $0^\circ\text{C}$ . After extraction with ethyl acetate, the organic layer was washed with sat. aqueous  $\text{NaHCO}_3$  and brine. The solvent was dried over  $\text{MgSO}_4$  and removed *in vacuo*. The resultant residue was purified by flash chromatography on silica gel (hexane/ethyl acetate = 10/1) to give (*R*)-2,2'-bis(trifluoromethanesulfonyl)-1,1'-binaphthalene (**2**) as a white solid (5.55 g, quantitative yield).

$^1\text{H}$  NMR (300 MHz,  $\text{CDCl}_3$ )  $\delta$  8.15 (d, 2H,  $J = 9.3$  Hz), 8.01 (d, 2H,  $J = 8.1$  Hz), 7.85 (d, 2H,  $J = 9.1$  Hz), 7.62 (d, 2H,  $J = 6.0$  Hz), 7.59 (t, 2H,  $J = 7.8$  Hz), 7.26 (d, 2H,  $J = 7.8$  Hz)

$^{13}\text{C}$  NMR (75 MHz,  $\text{CDCl}_3$ )  $\delta$  145.4, 133.1, 132.4, 132.0, 128.4, 128.0, 127.3, 126.8, 123.5, 119.3, 118.1 (q,  $^1J_{\text{CF}} = 318.0$  Hz)

$^{19}\text{F}$  NMR (282 MHz,  $\text{CDCl}_3$ )  $\delta$  -74.6

#### **(*R*)-2,2'-dimethyl-1,1'-binaphthalene (3)**<sup>4</sup>

To a stirred mixture of (*R*)-2,2'-bis(trifluoromethanesulfonyl)-1,1'-binaphthalene (**2**) (5.55 g, 10 mmol) and  $\text{NiCl}_2(\text{dppp})$  (379.4 mg, 0.7 mmol) in diethyl ether (80 mL) was added methyl magnesium bromide (13.3 mL, 3.0 M in diethyl ether solution, 40 mmol) at 0 °C over a period of 30 min. The reaction mixture was refluxed for 20 h, and then cooled to room temperature. The reaction was quenched slowly with water and diluted with 1 M  $\text{HCl}_{\text{aq}}$  at 0 °C. After extraction with hexane, the organic layer was washed with sat. aqueous  $\text{NaHCO}_3$  and brine. The solvent was dried over  $\text{MgSO}_4$  and removed *in vacuo*. The resultant residue was purified by silica gel column chromatography (hexane/EtOAc = 50/1) to give (*R*)-2,2'-dimethyl-1,1'-binaphthalene (**3**) as a white solid (2.76 g, 98%).

$^1\text{H}$  NMR (300 MHz,  $\text{CDCl}_3$ )  $\delta$  8.40-8.36 (m, 4H), 8.00 (d, 2H,  $J = 8.4$  Hz), 7.88 (t, 2H,  $J = 6.8$  Hz), 7.70 (d, 2H,  $J = 8.1$  Hz), 7.56 (t, 2H,  $J = 8.5$  Hz), 2.54 (s, 6H)

$^{13}\text{C}$  NMR (75 MHz,  $\text{CDCl}_3$ )  $\delta$  135.2, 134.4, 132.9, 132.3, 128.9, 128.1, 127.6, 126.2, 125.8, 125.0, 20.2

#### **(*R*)-2,2'-bis(bromomethyl)-1,1'-binaphthalene (4)**<sup>4</sup>

To a stirred mixture of 2,2'-dimethyl-1,1'-binaphthalene (**3**) (1.80 g, 6.36 mmol) and *N*-Bromosuccinimide (2.26 g, 12.72 mmol) in  $\text{CCl}_4$  (60 mL) were added AIBN (104.4 mg, 0.64 mmol) at room temperature. The reaction mixture was refluxed for 2 h, and then cooled to room temperature. The solvent was filtered and removed under reduced pressure. The residue was diluted with ethyl acetate and washed with water and brine. The solvent was dried over  $\text{MgSO}_4$  and removed *in vacuo*. The residual solid was recrystallized from EtOH/ $\text{CHCl}_3$  to afford (*R*)-2,2'-bis(bromomethyl)-1,1'-binaphthalene (**4**) (2.27 g, 81%).

$^1\text{H}$  NMR (300 MHz,  $\text{CDCl}_3$ )  $\delta$  8.03 (d, 2H,  $J = 8.5$  Hz), 7.93 (d, 2H,  $J = 8.1$  Hz), 7.76 (d, 2H,  $J = 8.6$  Hz), 7.50 (ddd, 2H,  $J = 9.3, 6.8, 1.1$  Hz), 7.28 (ddd, 2H,  $J = 9.7, 6.9, 1.2$  Hz), 7.08 (d, 2H,  $J = 8.4$  Hz), 4.26 (s, 4H)

$^{13}\text{C}$  NMR (75 MHz,  $\text{CDCl}_3$ )  $\delta$  134.3, 134.2, 133.3, 132.6, 129.5, 128.1, 127.8, 127.0, 126.9, 126.8, 32.7

#### **(*R*)-4,5-Dihydro-5-hydroxy-3H-dinaphtho-[1,2-c:2',1'-e]-phosphepine-5-Oxide (5)**<sup>5</sup>

To a stirred mixture of  $\text{NH}_4\text{H}_2\text{PO}_2$  (2.10 g, 6.10 mmol) in dichloromethane (80 mL) was added DIEA (11.9 mL, 68.14 mmol) at 0 °C. The reaction solution was stirred for 30 min and  $\text{TMSCl}$  (8.6 mL, 68.08 mmol) was added at 0 °C. The mixture was stirred for 2 h at room temperature and cooled to 0 °C. (*R*)-bis(bromomethyl)-1,1'-binaphthalene (**4**) (3.01 g, 6.84 mmol) in dichloromethane (30 mL) was added. The reaction mixture was stirred for 3 d at room temperature and quenched with water. After extraction with dichloromethane, the organic layer was washed with brine. The solvent was dried over  $\text{MgSO}_4$  and removed *in vacuo*. The resultant residue was purified

by silica gel column chromatography (dichloromethane to dichloromethane/methanol = 10/1) to give the corresponding phosphinic acid (**5**) (1.82 g, 78%).

$^1\text{H}$  NMR (300 MHz, DMSO- $d_6$ )  $\delta$  8.04 (d, 2H,  $J = 7.4$  Hz), 8.02 (d, 2H,  $J = 6.8$  Hz), 7.62 (d, 2H,  $J = 8.3$  Hz), 7.46 (t, 2H,  $J = 7.2$  Hz), 7.26 (t, 2H,  $J = 8.1$  Hz), 7.01 (d, 2H,  $J = 8.5$  Hz), 3.07 (dd, 2H,  $^2J_{\text{HP}} = 18.8$  Hz,  $^2J_{\text{HH}} = 13.9$  Hz), 2.67 (dd, 2H,  $^2J_{\text{HP}} = 16.0$  Hz,  $^2J_{\text{HH}} = 14.0$  Hz)

$^{13}\text{C}\{^1\text{H}\}$  NMR (75 MHz, DMSO- $d_6$ )  $\delta$  132.8, 132.7, 132.1 (d,  $^3J_{\text{CP}} = 2.3$  Hz), 131.7 (d,  $^2J_{\text{CP}} = 9.0$  Hz), 131.5 (d,  $^3J_{\text{CP}} = 2.3$  Hz), 128.6, 128.4, 128.3, 126.1, 125.4, 35.5 (d,  $^1J_{\text{CP}} = 86.8$  Hz)

$^{31}\text{P}\{^1\text{H}\}$  NMR (122 MHz, DMSO- $d_6$ )  $\delta$  61.2

#### **(R)- 4-methoxy-3,5-dihydrodinaphtho-[2,1-c:1',2'-e]-phosphepine 4-oxide (6)**

To a stirred mixture of phosphinic acid (**5**) (2.1 g, 20.4 mmol) in dichloromethane (25 mL) and methanol (25 mL) were added saturated  $\text{K}_2\text{CO}_3$  aq (10 mL) at 0 °C. The reaction mixture was stirred for 30 min at room temperature, and solvent was removed. MS 5 Å (5.0 g) and acetonitrile (30 mL) was added to the residue. The mixture was stirred for 1 h at room temperature, and MeI (6.0 mL 36.9 mmol) was added. The reaction mixture was refluxed for 2 h, and then cooled to room temperature. The solvent was filtered and removed *in vacuo*. The resultant residue was purified by silica gel column chromatography (dichloromethane/ethyl acetate = 7/1 to 4/1) to give the corresponding methyl phosphinate (**6**) (1.57 g, 72%).

$^1\text{H}$  NMR (300 MHz,  $\text{CDCl}_3$ )  $\delta$  7.97 (t, 2H,  $J = 7.9$  Hz), 7.93 (d, 2H,  $J = 7.5$  Hz), 7.62 (dd, 1H,  $J = 8.4, 1.1$  Hz), 7.48-7.42 (m, 3H), 7.27-7.16 (m, 4H), 3.78 (d, 3H,  $^3J_{\text{HP}} = 10.8$  Hz), 3.22-2.96 (m, 4H)

$^{13}\text{C}\{^1\text{H}\}$  NMR (75 MHz,  $\text{CDCl}_3$ )  $\delta$  133.6 (d,  $^3J_{\text{CP}} = 4.5$  Hz), 133.4 (d,  $^3J_{\text{CP}} = 3.8$  Hz), 132.7 (d,  $^4J_{\text{CP}} = 3.0$  Hz), 132.5 (d,  $^4J_{\text{CP}} = 3.0$  Hz), 132.0 (d,  $^4J_{\text{CP}} = 2.3$  Hz), 132.0 (d,  $^4J_{\text{CP}} = 2.3$  Hz), 130.1 (d,  $^2J_{\text{CP}} = 9.7$  Hz), 129.32, 129.29, 129.1, 129.0, 128.1 (d,  $^2J_{\text{CP}} = 7.5$  Hz), 128.0 (d,  $^3J_{\text{CP}} = 4.5$  Hz), 127.5 (d,  $^3J_{\text{CP}} = 4.5$  Hz), 126.8, 126.6, 126.3, 126.2, 125.6, 125.5, 51.2 (d,  $^2J_{\text{CP}} = 6.8$  Hz), 34.0 (d,  $^1J_{\text{CP}} = 87.8$  Hz), 33.3 (d,  $^1J_{\text{CP}} = 86.2$  Hz)

$^{31}\text{P}\{^1\text{H}\}$  NMR (122 MHz,  $\text{CDCl}_3$ )  $\delta$  66.6

FT-IR (KBr pellet,  $\text{cm}^{-1}$ ) 3658, 3470, 3052, 3007, 2950, 2916, 2845, 2229, 1955, 1922, 1594, 1254, 1232, 1037, 848, 836.

HRMS(ESI-TOF) Calcd for  $\text{C}_{23}\text{H}_{19}\text{NaO}_2\text{P}$  [ $\text{M}+\text{Na}$ ] $^+$ : 381.1020, Found: 381.1023.

$[\alpha]_{\text{D}}^{25} -177.7$  ( $c$  1.48,  $\text{CHCl}_3$ )

#### **(R)- 3,3,5,5-tetrafluoro-4-methoxy-3,5-dihydrodinaphtho[2,1-c:1',2'-e]phosphepine 4-oxide (7)**

To a stirred mixture of methyl phosphinate (**6**) (179.2 mg, 0.50 mmol) in THF (15 mL) and was added NaHMDS (2.2 mL in THF, 2.20 mmol) at -78 °C, and the solution was stirred for 1 h. NFSI (946.0 mg, 3.00 mmol) in THF (20 mL) was added to the solution at -78 °C, and then stirred for 3 h. The reaction was quenched with sat. aqueous  $\text{NH}_4\text{Cl}$  at 0 °C. After extraction with ethyl acetate, the organic layer was washed with sat. aqueous  $\text{NaHCO}_3$  and brine. The solvent was dried over  $\text{MgSO}_4$ , then removed *in vacuo*. The resultant residue was purified by silica gel column chromatography (dichloromethane/methanol = 50/1 to 30/1) to give the corresponding methyl phosphinate (**7**) (135.1

mg, 63%).

$^1\text{H}$  NMR (300 MHz,  $\text{CDCl}_3$ )  $\delta$  8.14 (d, 1H,  $J$  = 8.5 Hz), 8.13 (d, 1H,  $J$  = 8.1 Hz), 7.98 (d, 2H,  $J$  = 8.3 Hz), 7.94 (d, 1H,  $J$  = 8.8 Hz), 7.84 (d, 1H,  $J$  = 8.7 Hz), 7.58-7.54 (m, 2H), 7.32-7.27 (m, 2H), 7.16 (d, 1H,  $J$  = 8.5 Hz), 7.15 (d, 1H,  $J$  = 8.5 Hz), 4.04 (d, 3H,  $^3J_{\text{HP}}$  = 10.4 Hz)

$^{13}\text{C}\{^1\text{H}\}$  NMR  $\delta$  135.9, 134.7, 134.6, 134.4, 134.3, 132.6, 130.4, 130.1, 129.8, 129.5, 128.5, 128.4, 128.0, 127.4, 127.3, 127.2, 126.9~125.8 (m, 2C), 121.8 (dt,  $^3J_{\text{CP}}$  = 13.6 Hz,  $^3J_{\text{CF}}$  = 2.7 Hz), 121.3 (dt,  $^3J_{\text{CP}}$  = 13.4 Hz,  $^3J_{\text{CF}}$  = 2.7 Hz), 117.88 (tdd,  $^1J_{\text{CF}}$  = 274.4 Hz,  $^1J_{\text{CP}}$  = 142.3 Hz,  $^3J_{\text{CF}}$  = 8.9 Hz), 117.87 (tdd,  $^1J_{\text{CF}}$  = 269.0 Hz,  $^1J_{\text{CP}}$  = 145.3 Hz,  $^3J_{\text{CF}}$  = 9.4 Hz), 55.0 (d,  $^2J_{\text{CP}}$  = 7.6 Hz)

$^{19}\text{F}$  NMR (282 MHz,  $\text{CDCl}_3$ )  $\delta$  -91.2 (dd, 1F,  $^2J_{\text{FF}}$  = 281.4,  $^2J_{\text{FP}}$  = 88.3 Hz), -92.6 (dd, 1F,  $^2J_{\text{FF}}$  = 296.7,  $^2J_{\text{FP}}$  = 115.1 Hz),  $\delta$  -120.5 (ddd, 1F,  $^2J_{\text{FF}}$  = 280.6 Hz,  $^2J_{\text{FP}}$  = 98.4 Hz,  $^4J_{\text{FF}}$  = 10.0 Hz) -123.4 (ddd, 1F,  $^2J_{\text{FF}}$  = 294.7,  $^2J_{\text{FP}}$  = 92.5 Hz,  $^4J_{\text{FF}}$  = 13.9 Hz,)

$^{31}\text{P}\{^1\text{H}\}$  NMR (122 MHz,  $\text{CDCl}_3$ )  $\delta$  28.3-25.0 (m)

FT-IR (KBr pellet,  $\text{cm}^{-1}$ ) 3658, 3470, 3052, 3007, 2950, 2916, 2845, 2229, 1955, 1922, 1594, 1254, 1232, 1037, 848, 836.

HRMS(ESI-TOF) Calcd for  $\text{C}_{23}\text{H}_{16}\text{F}_4\text{O}_2\text{P}$   $[\text{M}+\text{H}]^+$ : 431.0824, Found: 431.0843.

$[\alpha]_{\text{D}}^{24}$  -177.4 ( $c$  12.3,  $\text{CHCl}_3$ )

#### **(R)-3,3,5,5-tetrafluoro-4-hydroxy-3,5-dihydrodinaphtho[2,1-c:1',2'-e]phosphepine 4-oxide (8)**

To a stirred mixture of methyl phosphinate (**7**) (168.9 mg, 0.39 mmol) in dichloromethane (5 mL) and methanol (5 mL) was added 2 M  $\text{NaOH}_{\text{aq}}$  (5 mL) at 0 °C, and then stirred for 1 h at room temperature. The reaction mixture was quenched with 1 M  $\text{HCl}_{\text{aq}}$  (10 mL) at 0 °C. After extraction with ethyl acetate, the organic layer was washed with brine. The solvent was dried over  $\text{MgSO}_4$  and removed *in vacuo*. The resultant residue was purified by silica gel column chromatography (dichloromethane to dichloromethane/methanol = 10/1). The solid was dissolved in dichloromethane and washed with 3 M  $\text{HCl}_{\text{aq}}$ . The solvent was removed *in vacuo* to give the corresponding phosphinic acid (**8**) (163.0 mg, quantitative yield).

$^1\text{H}$  NMR (300 MHz,  $\text{DMSO}-d_6$ )  $\delta$  8.20 (d, 2H,  $J$  = 8.3 Hz), 8.09 (d, 2H,  $J$  = 8.1 Hz), 7.77 (d, 2H,  $J$  = 8.4 Hz), 7.57 (t, 2H,  $J$  = 7.2 Hz), 7.33 (t, 2H,  $J$  = 7.9 Hz), 7.00 (d, 2H,  $J$  = 8.4 Hz), 5.47 (brs, 1H)

$^{13}\text{C}\{^1\text{H}\}$  NMR (75 MHz,  $\text{DMSO}-d_6$ )  $\delta$  133.8, 133.7 (d,  $^3J_{\text{CP}}$  = 6.0 Hz), 132.3, 130.1, 129.6, 128.8, 127.5 (d,  $^2J_{\text{CP}}$  = 12.9 Hz), 126.9, 122.3, 122.1, 119.8 (tdt,  $^1J_{\text{CF}}$  = 272.3 Hz,  $^1J_{\text{CP}}$  = 135.9 Hz,  $^3J_{\text{CF}}$  = 10.6 Hz,)

$^{19}\text{F}$  NMR (282 MHz,  $\text{DMSO}-d_6$ )  $\delta$  -85.9 (dd, 2F,  $^2J_{\text{FF}}$  = 279.5,  $^2J_{\text{FP}}$  = 83.2 Hz), -119.4 (dd, 2F,  $^2J_{\text{FF}}$  = 280.0,  $^2J_{\text{FP}}$  = 87.7 Hz)

$^{31}\text{P}\{^1\text{H}\}$  NMR (122 MHz,  $\text{CDCl}_3$ )  $\delta$  21.6 (tt,  $J_{\text{FP}}$  = 86.3 Hz, 85.1 Hz)

FT-IR (KBr pellet,  $\text{cm}^{-1}$ ) 3650, 3347, 3068, 2216, 1929, 1647, 1333, 1249, 1150, 1063, 819, 655, 561.

HRMS(ESI-TOF)  $\text{C}_{22}\text{H}_{12}\text{F}_4\text{O}_2\text{P}$   $[\text{M}-\text{H}]^-$ : 415.0511, Found: 415.0497.

$[\alpha]_{\text{D}}^{23}$  = -130.9 ( $c$  0.43,  $\text{CHCl}_3$ )

**(*R*)-2,2'-bis(dibromomethyl)-1,1'-binaphthalene (9)**<sup>4</sup>

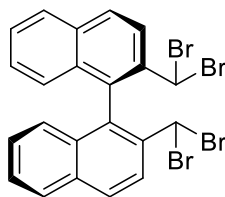

To a stirred mixture of (*R*)-2,2'-dimethyl-1,1'-binaphthalene (**3**) (2.24 g, 7.93 mmol) and *N*-bromosuccinimide (15.7 g, 88 mmol) in CCl<sub>4</sub> (40 mL) was added AIBN (65.6 mg, 0.4 mmol) at room temperature. The reaction mixture was refluxed 12 h, and then cooled to room temperature. The solvent was filtered and removed under reduced pressure. The residue was diluted with ethyl acetate and washed with water and brine. The solvent was dried over MgSO<sub>4</sub> and removed *in vacuo*. The residual solid was recrystallized from EtOH/CHCl<sub>3</sub> to afford (*R*)-2,2'-bis(dibromomethyl)-1,1'-binaphthalene (**9**) as a white solid (4.17g, 88%).

<sup>1</sup>H NMR (300 MHz, CDCl<sub>3</sub>) δ 8.28 (d, 2H, *J* = 8.7 Hz), 8.17 (d, 2H, *J* = 8.7 Hz), 7.97 (d, 2H, *J* = 8.1 Hz), 7.55 (ddd, 2H, *J* = 8.0, 6.9, 1.1 Hz), 7.32 (ddd, 2H, *J* = 8.3, 7.0, 1.2 Hz), 7.04 (d, 2H, *J* = 8.4 Hz), 6.26 (s, 2H)

<sup>13</sup>C{<sup>1</sup>H} NMR (75 MHz, CDCl<sub>3</sub>) δ 138.2, 133.7, 130.8, 130.7, 128.2, 127.9, 127.8, 127.6, 127.5, 126.5, 39.1

**(*R*)-1,1'-binaphthyl-2,2'-dicarbaldehyde (10)**<sup>4</sup>

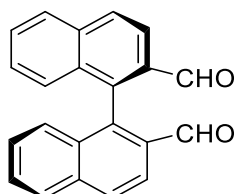

To a stirred mixture of (*R*)-2,2'-bis(dibromomethyl)-1,1'-binaphthalene (**9**) (4.17 g, 6.97 mmol) in THF (70 mL) and water (35 mL) was added AgNO<sub>3</sub> (5.95 g, 35 mmol) at room temperature. The reaction mixture was refluxed for 4 h, and then cooled to room temperature. The reaction mixture was filtered and quenched with brine at 0 °C. After extraction with ethyl acetate, the organic layer was washed with sat. aqueous NaHCO<sub>3</sub> and brine. The solvent was dried over MgSO<sub>4</sub> and removed *in vacuo*. The resultant residue was purified by silica gel column chromatography (hexane/EtOAc = 50/1 to 30/1) to give (*R*)-1,1'-binaphthyl-2,2'-dicarbaldehyde (**10**) as a yellow solid (2.12 g, 98%).

<sup>1</sup>H NMR (300 MHz, CDCl<sub>3</sub>) δ 9.62 (s, 2H), 8.21 (d, 2H, *J* = 8.4 Hz), 8.13 (d, 2H, *J* = 8.4 Hz), 8.02 (d, 2H, *J* = 8.1 Hz), 7.64 (ddd, 2H, *J* = 8.1, 6.9, 1.1 Hz), 7.37 (ddd, 2H, *J* = 8.4, 6.9, 1.2 Hz), 7.24 (d, 2H, *J* = 8.4 Hz)

<sup>13</sup>C{<sup>1</sup>H} NMR (75 MHz, CDCl<sub>3</sub>) δ 191.3, 139.8, 136.1, 133.6, 133.4, 129.9, 129.6, 128.7, 128.1, 127.4, 122.4

**(R)-1,1'-(1,1'-binaphthalene-2,2'-diyl)-bis(2,2,2-trifluoroethanone) (12a)<sup>6</sup>**

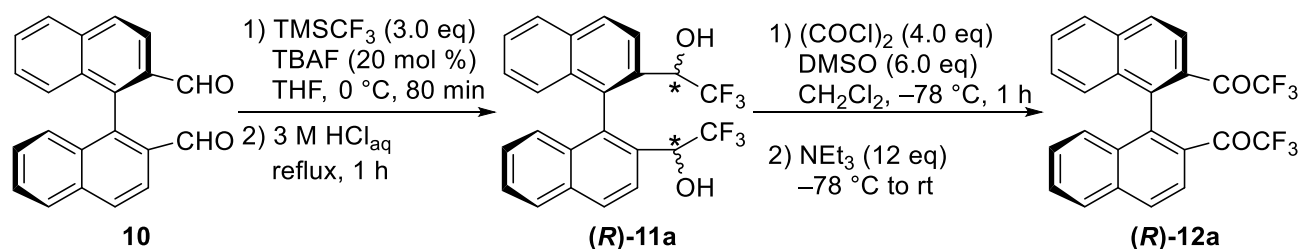

To a stirred mixture of (R)-1,1'-binaphthyl-2,2'-dicarbaldehyde (**10**) (1.02 g, 3.3 mmol) and TMSCF<sub>3</sub> (1.5 mL, 9.9 mmol) in THF (35 mL) were added tetrabutylammonium fluoride (660 μL, 0.66 mmol) at 0 °C. After stirred for 80 min at 0 °C, the reaction mixture was quenched with 3 M HCl<sub>aq</sub>, and refluxed for 3 h. After cooling to room temperature, the solution was extracted with ethyl acetate and the organic layer was washed with sat. aqueous NaHCO<sub>3</sub> and brine. The solvent was dried over Na<sub>2</sub>SO<sub>4</sub> and removed *in vacuo*.

To a solution of oxalyl chloride (1.13 mL, 13.2 mmol) in CH<sub>2</sub>Cl<sub>2</sub> (6.6 mL) was added DMSO (1.40 mL, 19.8 mmol) slowly at -78 °C and stirred for 5 min. To the reaction mixture was added the solution of obtained diol in CH<sub>2</sub>Cl<sub>2</sub> (6.6 mL) slowly at -78 °C. After stirred for 1h, triethylamine (5.50 mL, 39.6 mmol) was added to this mixture. After warmed to room temperature, the reaction mixture was diluted with CH<sub>2</sub>Cl<sub>2</sub> and quenched with sat. aqueous NH<sub>4</sub>Cl. The organic layer was separated, and then the aqueous layer was extracted with CH<sub>2</sub>Cl<sub>2</sub>. The combined organic layers were washed with brine twice and dried over MgSO<sub>4</sub>. The solvent was removed *in vacuo*, and the resultant residue was purified by silica gel column chromatography (hexane/EtOAc = 100/1) to give (R)-1,1'-(1,1'-binaphthalene-2,2'-diyl)-bis(2,2,2-trifluoroethanone) as a yellow solid ((R)-**12a**) (1.08 g, 73% in two steps).

<sup>1</sup>H NMR (300 MHz, CDCl<sub>3</sub>) δ 8.16-8.12 (m, 4H), 8.01 (d, 2H, *J* = 8.3 Hz), 7.62 (ddd, 2H, *J* = 8.0, 6.9, 1.0 Hz), 7.32 (ddd, 2H, *J* = 8.3, 6.9, 1.2 Hz), 7.06 (d, 2H, *J* = 8.6 Hz)

<sup>13</sup>C{<sup>1</sup>H} NMR (75 MHz, CDCl<sub>3</sub>) δ 181.4 (q, <sup>2</sup>*J*<sub>CF</sub> = 34.5 Hz), 141.2, 135.7, 132.9, 129.5, 128.9, 128.4, 127.9, 127.3, 127.1, 124.1 (q, <sup>3</sup>*J*<sub>CF</sub> = 4.5 Hz), 116.4 (q, <sup>1</sup>*J*<sub>CF</sub> = 291.0 Hz)

<sup>19</sup>F NMR (282 MHz, CDCl<sub>3</sub>) δ -71.6

[α]<sub>D</sub><sup>26</sup> -65.7 (*c* 0.74, CHCl<sub>3</sub>)

**(R)-1,1'-([1,1'-binaphthalene]-2,2'-diyl)bis(2,2,3,3,3-pentafluoropropan-1-one) (12b)<sup>7</sup>**

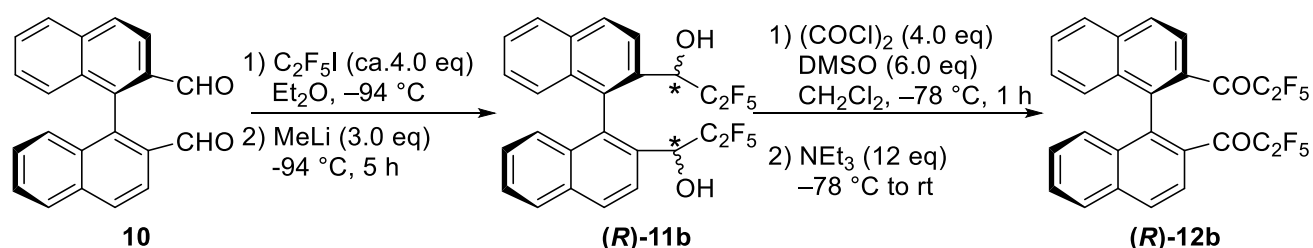



To a stirred mixture of (*R*)-1,1'-binaphthyl-2,2'-dicarbaldehyde (**10**) (1.40 g, 4.52 mmol) in Et<sub>2</sub>O (35 mL) was added pentafluoroethyl iodide (ca. 18.1 mmol) at -94 °C. After stirred for 5 min at -94 °C, methyllithium/lithium bromide solution (1.5 M in diethyl ether, 12.1 mL, 18.1 mmol) was added slowly. After stirred for 5 h, the reaction mixture was quenched with 1 M HCl<sub>aq</sub>. The organic layer was extracted with ethyl acetate and washed with and brine. The solvent was dried over Na<sub>2</sub>SO<sub>4</sub> and removed *in vacuo*.

To a solution of oxalyl chloride (1.55 mL, 18.1 mmol) in CH<sub>2</sub>Cl<sub>2</sub> was added DMSO (1.85 mL, 26.12 mmol) slowly at -78 °C and stirred for 5 min. To the reaction mixture was added the solution of obtained diol in CH<sub>2</sub>Cl<sub>2</sub> (23 mL) slowly at -78 °C. After stirred for 1 h, triethylamine (7.56 mL, 54.2 mmol) was added to this mixture. After warmed to room temperature, the reaction mixture was diluted with CH<sub>2</sub>Cl<sub>2</sub> and quenched with sat. aqueous NH<sub>4</sub>Cl. The organic layer was separated, and then the aqueous layer was extracted with CH<sub>2</sub>Cl<sub>2</sub>. The combined organic layers were washed with brine twice and dried over MgSO<sub>4</sub>. The solvent was removed *in vacuo*, and the resultant residue was purified by silica gel column chromatography (hexane/EtOAc = 100/1) to give (*R*)-1,1'-([1,1'-binaphthalene]-2,2'-diyl)bis(2,2,3,3,3-pentafluoropropan-1-one) as a yellow solid (**(R)-12b**) (2.01 g, 82% in two steps).

<sup>1</sup>H NMR (300 MHz, CDCl<sub>3</sub>) δ 8.14-8.08 (m, 4H), 7.995 (d, 2H, *J* = 8.2 Hz), 7.61 (ddd, 2H, *J* = 8.0, 7.6, 1.0 Hz), 7.33 (ddd, 2H, *J* = 8.5, 6.9, 1.2 Hz), 7.08 (d, 2H, *J* = 8.6 Hz)

<sup>13</sup>C{<sup>1</sup>H} NMR (75 MHz, CDCl<sub>3</sub>) δ 184.9 (t, <sup>2</sup>*J*<sub>CF</sub> = 26.3 Hz), 140.2, 135.5, 133.1, 129.4, 128.9, 128.8, 127.9, 127.4, 123.7 (t, <sup>3</sup>*J*<sub>CF</sub> = 5.3 Hz), 118.0 (qt, <sup>1</sup>*J*<sub>CF</sub> = 285.0 Hz <sup>2</sup>*J*<sub>CF</sub> = 33.8 Hz), 108.1 (tq, <sup>1</sup>*J*<sub>CF</sub> = 288.8 Hz <sup>2</sup>*J*<sub>CF</sub> = 36.8 Hz)

<sup>19</sup>F NMR (282 MHz, CDCl<sub>3</sub>) δ -81.4, 114.9

FT-IR (KBr pellet, cm<sup>-1</sup>) 3415, 3068, 2360, 2341, 1718, 1620, 1591, 1349, 1315, 1220, 1180, 1140, 1092, 968, 951, 924, 828, 802, 794, 760, 741, 731, 654

HRMS(APCI-TOF) Calcd for C<sub>26</sub>H<sub>12</sub>F<sub>10</sub>O<sub>2</sub> [M-H]<sup>+</sup>: 547.07559, Found: 547.07626

[α]<sub>D</sub><sup>21</sup> = -2532.6 (*c* 0.01, CHCl<sub>3</sub>)

### Preparation of methyl phosphinate (**13**)

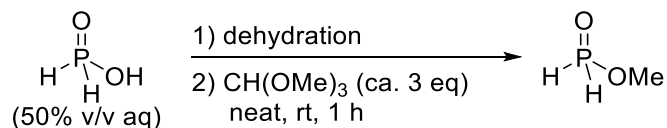

To prepare anhydrous phosphinic acid, the stirring mixture of aqueous phosphinic acid (15.0 mL, 50% v/v aq) was evacuated for 30 min at 40 °C, and then azeotroped with anhydrous toluene.

To the anhydrous phosphinic acid was added trimethyl orthoformate (40.0 mL) at room temperature, and the solution was stirred for 1 h at room temperature.

Remaining trimethyl orthoformate and methanol was removed under reduced pressure (This process is performed just before carrying out the next cycloaddition reaction, due to avoid the decomposition of methyl phosphinate (**13**)). After removed trimethyl orthoformate and methanol, methyl phosphinate was collected in a cold trap under reduced pressure. Solvent (10 mL) was added

to obtain the solution of methyl phosphinate (**13**). The conversion of phosphinic acid (>99%) and the concentration of methyl phosphinate (**13**) was determined by  $^1\text{H}$  and  $^{31}\text{P}$  NMR analysis using dichloromethane (10  $\mu\text{L}$ , 0.157 mmol) as an internal standard in solution (0.5 mL sample) and sealed capillary filled with benzene- $d_6$  for signal lock.

$^1\text{H}$  NMR (300 MHz, THF, benzene- $d_6$  for signal lock)  $\delta$  7.55 (d, 2H,  $^1J_{\text{HP}} = 564.5$  Hz), 4.29 (d, 3H,  $^3J_{\text{HP}} = 12.8$  Hz)

$^{31}\text{P}\{^1\text{H}\}$  NMR (122 MHz, THF, benzene- $d_6$  for signal lock)  $\delta$  17.4

### Synthesis of diol (**14a**)

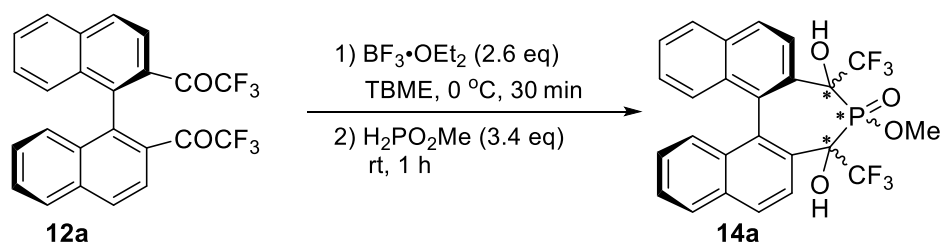

To a stirred mixture of diketone **12a** (34.6 mg, 0.08 mmol) in TBME (1.0 mL) was added  $\text{BF}_3 \cdot \text{OEt}_2$  (24.7  $\mu\text{L}$ , 0.2 mmol) at 0  $^\circ\text{C}$ , and then the mixture was stirred for 30 min. After methyl phosphinate (**16a**) or (**16b**) (96.7  $\mu\text{L}$ , 2.7 M in TBME, 0.3 mmol) was added at 0  $^\circ\text{C}$ , the reaction mixture was stirred for 1 h at room temperature. After confirming the completion of reaction by TLC analysis, the reaction mixture was quenched with 1 M  $\text{HCl}_{\text{aq}}$ . The reaction mixture was extracted with ethyl acetate, and organic layer was washed with brine. The solvent was dried over  $\text{Na}_2\text{SO}_4$  and removed *in vacuo* to give the corresponding diastereomer of diol (**14a**) (84%, *dr* = 9.5:1:2.4:1.6). The yields and diastereoratio of diastereomer was determined by  $^{19}\text{F}$  and  $^{31}\text{P}$  NMR analysis.

### Deprotection of diol(**14a**)

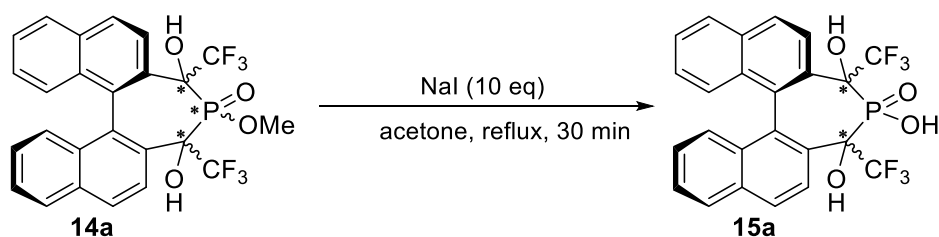

To a stirred mixture of methyl phosphinate (**14a**) (0.0655 mmol, d1:d2:d3:d4 = 9.5:1:2.4:1.6) in acetone (2.0 mL) was added sodium iodide (108.1 mg, 0.655 mmol) at room temperature. The reaction mixture was stirred for 30 min at room temperature, and quenched with 1 M  $\text{HCl}_{\text{aq}}$ . The organic layer was extracted with dichloromethane and washed with 1 M  $\text{HCl}_{\text{aq}}$ . The solvent was dried over  $\text{MgSO}_4$  and removed *in vacuo*. (79.4 mg, 77%). The yield was determined by  $^{19}\text{F}$  NMR analysis using benzotrifluoride (10  $\mu\text{L}$ , 0.0814 mmol) as an internal standard.

**Isolation of diastereomer 1 and 2**  
**diastereomer d2**

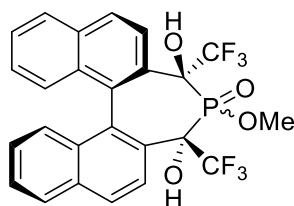

Purification of diol (**14a**) by silica gel column chromatography (hexane/ethyl acetate = 10/1) and recrystallization (chloroform/hexane) gives the corresponding isomer of diol **d2**.

$^1\text{H}$  NMR (300 MHz,  $\text{CDCl}_3$ )  $\delta$  8.02 (d, 2H,  $J = 8.9$  Hz), 7.92 (d, 2H,  $J = 8.3$  Hz), 7.81 (t, 2H,  $J = 9.5$  Hz), 7.50 (t, 2H,  $J = 7.1$  Hz), 7.30-7.22 (m, 2H), 7.09 (d, 1H,  $J = 14.5$  Hz), 7.06 (d, 1H,  $J = 14.4$  Hz), 3.98 (d, 3H,  $J = 10.2$  Hz), 3.37 (d, 1H,  $J = 9.1$  Hz), 2.55 (d, 1H,  $J = 11.9$  Hz)

$^{19}\text{F}$  NMR (282MHz,  $\text{CDCl}_3$ )  $\delta$  -67.7 (s, 3F), -67.8 (s, 3F)

$^{31}\text{P}\{^1\text{H}\}$  NMR (122MHz,  $\text{CDCl}_3$ )  $\delta$  40.3

HRMS(ESI-TOF) Calcd for  $\text{C}_{25}\text{H}_{17}\text{F}_6\text{NaO}_4\text{P}$   $[\text{M}+\text{Na}]^+$ : 549.0666, Found: 549.0677.

**diastereomer d3**

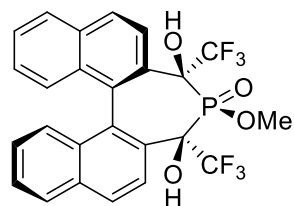

Purification of diol (**14a**) by silica gel column chromatography (hexane/ethyl acetate = 10/1) and recrystallization (chloroform/hexane) gives the corresponding isomer of diol **d3**.

$^1\text{H}$  NMR (300 MHz,  $\text{CDCl}_3$ )  $\delta$  8.14 (dd, 1H,  $J = 9.0, 1.5$  Hz), 8.04 (q, 2H,  $J = 4.5$  Hz), 7.91 (dd, 2H,  $J = 7.8, 3.3$  Hz), 7.77 (d, 1H,  $J = 8.7$  Hz), 7.49 (dd, 2H,  $J = 11.7, 7.5$  Hz), 7.22-7.16 (m, 2H), 6.98 (d, 1H,  $J = 8.4$  Hz), 6.84 (d, 1H,  $J = 8.4$  Hz), 4.99 (d, 1H,  $J = 10.8$  Hz), 3.88 (d, 3H,  $J = 10.8$  Hz), 3.28 (d, 1H,  $J = 8.7$  Hz)

$^{19}\text{F}$  NMR (282MHz,  $\text{CDCl}_3$ )  $\delta$  -67.9 (s, 3F), -70.5 (s, 3F)

$^{31}\text{P}\{^1\text{H}\}$  NMR (122MHz,  $\text{CDCl}_3$ )  $\delta$  46.7

HRMS(ESI-TOF) Calcd for  $\text{C}_{25}\text{H}_{17}\text{F}_6\text{NaO}_4\text{P}$   $[\text{M}+\text{Na}]^+$ : 549.0666, Found: 549.0649.

**(3R,5R)-3,5-difluoro-4-methoxy-3,5-bis(perfluoroethyl)-3,5-dihydrodinaphtho[2,1-c:1',2'-e]phosphine 4-oxide(16a)**

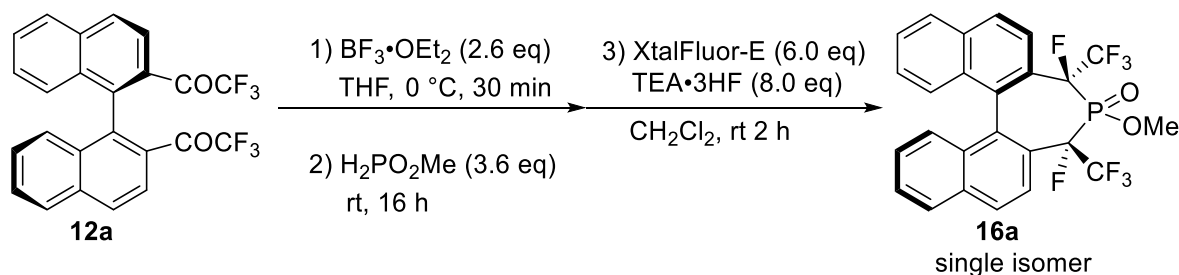

To a stirred mixture of (*R*)-diketone **12a** (446.4 mg, 1.0 mmol) in THF (0.25 mL) was treated with addition/cyclization sequence (described above), to obtain the diastereomer of diol (**14a**) (94%, *dr* = 58:6:18:11). The yields and diastereoratio of diastereomer was determined by  $^{31}\text{P}$  NMR analysis.

To a stirred mixture of the corresponding diol in  $\text{CH}_2\text{Cl}_2$  (30 mL) were added XtalFluor-E® (1.4 g, 6.0 mmol) and TEA·3HF (666  $\mu\text{L}$ , 4.0 mmol) at 0 °C, and then the reaction mixture was stirred for 30 min at room temperature. The reaction mixture was quenched with water at 0 °C. The organic layer was extracted with  $\text{CH}_2\text{Cl}_2$  and washed with brine. The solvent was dried over  $\text{Na}_2\text{SO}_4$  and removed *in vacuo*. The resultant residue was purified by silica gel column chromatography (hexane/ethyl acetate = 20/1 to 10/1) to give the corresponding methyl phosphinate (**16a**) (299.4 mg, 57% in two steps).

$^1\text{H}$  NMR (300 MHz,  $\text{CDCl}_3$ )  $\delta$  8.06 (d, 2H,  $J = 8.8$  Hz), 7.96 (d, 2H,  $J = 8.2$  Hz), 7.78 (d, 1H,  $J = 7.9$  Hz), 7.75 (d, 1H,  $J = 9.0$  Hz), 7.58-7.52 (m, 2H), 7.32-7.25 (m, 2H), 7.11 (t, 2H,  $J = 9.5$  Hz), 3.98 (d, 3H,  $^3J_{\text{HP}} = 10.7$  Hz)

$^{13}\text{C}\{^1\text{H}\}$  NMR (75 MHz,  $\text{CDCl}_3$ )  $\delta$  137.7 (d,  $^3J_{\text{CF}} = 3.0$  Hz), 137.4 (d,  $^3J_{\text{CF}} = 1.5$  Hz), 133.9, 133.7, 133.1 (d,  $^3J_{\text{CF}} = 1.5$  Hz), 133.1 (d,  $^3J_{\text{CF}} = 1.5$  Hz), 131.0, 130.3, 130.0, 129.8, 128.9, 128.2, 128.1, 127.5, 127.3, 122.23 (qdd,  $^1J_{\text{CF}} = 287.7$  Hz  $^2J_{\text{CF}} = 27.6$  Hz  $^2J_{\text{CP}} = 4.2$  Hz), 122.21 (qdd,  $^1J_{\text{CF}} = 286.9$  Hz  $^2J_{\text{CF}} = 27.0$  Hz  $^2J_{\text{CP}} = 5.1$  Hz), 122.3-121.9 (m), 97.4-92.2 (m, 2C), 54.9 (d,  $^2J_{\text{CP}} = 7.6$  Hz)

$^{19}\text{F}$  NMR (282 MHz,  $\text{CDCl}_3$ )  $\delta$  -67.3 (d, 3F,  $^3J_{\text{FF}} = 8.5$  Hz), -67.4 (d, 3F,  $^3J_{\text{FF}} = 6.8$  Hz), -151.9 (d, 1F,  $^2J_{\text{FP}} = 60.1$  Hz), -159.2 (d, 1F,  $^2J_{\text{FP}} = 84.6$  Hz)

$^{31}\text{P}\{^1\text{H}\}$  NMR (122 MHz,  $\text{CDCl}_3$ )  $\delta$  30.9 (dd,  $^2J_{\text{PF}} = 86.3, 63.8$  Hz)

FT-IR (KBr pellet,  $\text{cm}^{-1}$ ) 3068, 2965, 2928, 2860, 2254, 1915, 1820, 1728, 1597, 1510, 1465, 1377, 1197, 1062, 1032, 967, 810, 746

HRMS(ESI-TOF) Calcd for  $\text{C}_{25}\text{H}_{15}\text{F}_8\text{NaO}_2\text{P}$   $[\text{M}+\text{Na}]^+$ : 553.0580, Found: 553.0582.

$[\alpha]_{\text{D}}^{23} = -105.2$  (*c* 4.17,  $\text{CHCl}_3$ )

**(3*R*,5*R*)-3,5-difluoro-4-methoxy-3,5-bis(perfluoroethyl)-3,5-dihydrodinaphtho[2,1-*c*:1',2'-*e*]phosphine 4-oxide(**16b**)**

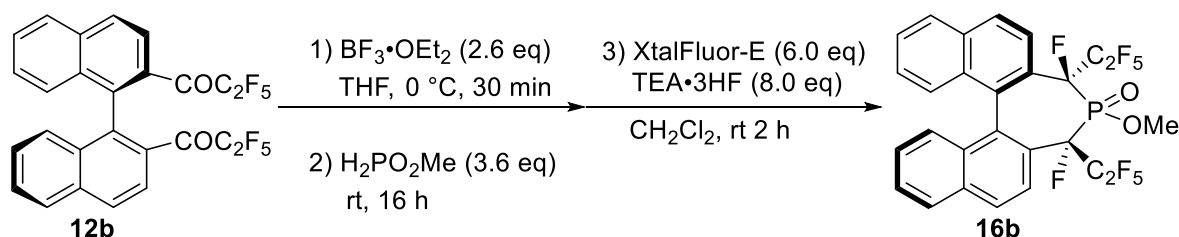

To a stirred mixture of (*R*)-diketone **12b** (34.6 mg, 0.21 mmol) in THF (0.25 mL) was added BF<sub>3</sub>·OEt<sub>2</sub> (68 µL, 0.54 mmol) at 0 °C, and then the mixture was stirred for 30 min. After methyl phosphinate (**13**) (1.1 mL, 0.66 M in THF, 0.73 mmol) was added at 0 °C, the reaction mixture was stirred for 1 h at room temperature. After confirming the completion of reaction by TLC analysis, the reaction mixture was quenched with 1 M HCl<sub>aq</sub>. The reaction mixture was extracted with ethyl acetate, and organic layer was washed with brine. The solvent was dried over Na<sub>2</sub>SO<sub>4</sub> and removed *in vacuo* to give the corresponding diastereomer of diol (**13b**) (84%, *dr* = 80: <1:2:2). The yields and diastereoratio of diastereomer was determined by <sup>31</sup>P NMR analysis.

To a stirred mixture of the corresponding diol in CH<sub>2</sub>Cl<sub>2</sub> (2.0 mL) were added XtalFluor-E® (286 mg, 1.26 mmol) and TEA·3HF (274 µL, 1.68 mmol) at 0 °C, and then the reaction mixture was stirred for 30 min at room temperature. The reaction mixture was quenched with water at 0 °C. The organic layer was extracted with CH<sub>2</sub>Cl<sub>2</sub> and washed with brine. The solvent was dried over Na<sub>2</sub>SO<sub>4</sub> and removed *in vacuo*. The resultant residue was purified by silica gel column chromatography (hexane/ethyl acetate = 20/1 to 10/1) to give the corresponding methyl phosphinate (**16b**) (27.8 mg, 21% in two steps).

#### **13b d1**

<sup>1</sup>H NMR (300 MHz, acetone -d<sub>6</sub>) δ 8.31 (d, 1H, *J* = 8.9 Hz), 8.26 (d, 2H, *J* = 9.5 Hz), 8.21 (d, 1H, *J* = 9.2 Hz), 8.04-8.01 (m, 2H), 7.51 (dt, 2H, *J* = 7.1, 6.6 Hz), 7.22-7.17 (m, 2H), 7.15 (d, 1H, *J* = 7.4 Hz), 6.84 (d, 1H, *J* = 8.6 Hz), 6.73 (d, 1H, *J* = 8.6 Hz), 3.94 (d, 3H, <sup>3</sup>*J*<sub>HP</sub> = 10.4 Hz)

<sup>19</sup>F NMR (282 MHz, acetone -d<sub>6</sub>) δ -78.4 (s, 3F), -78.7 (d, 3F), -110.5--114.6 (m, 4F)

<sup>31</sup>P{<sup>1</sup>H} NMR (122 MHz, acetone-d<sub>6</sub>) δ 47.7

#### **16b**

<sup>1</sup>H NMR (300 MHz, CDCl<sub>3</sub>) δ 8.06 (d, 1H, *J* = 8.9 Hz), 8.05 (d, 1H, *J* = 8.5 Hz), 7.95 (d, 2H, *J* = 8.4 Hz), 7.92 (d, 1H, *J* = 9.9 Hz), 7.82 (d, 1H, *J* = 8.7 Hz), 7.56 (t, 2H, *J* = 6.9 Hz), 7.34-7.19 (m, 4H), 4.01 (d, 3H, <sup>3</sup>*J*<sub>HP</sub> = 10.8 Hz)

<sup>13</sup>C{<sup>1</sup>H} NMR (75 MHz, CDCl<sub>3</sub>) δ 137.4, 137.2, 133.8, 133.6, 132.99, 132.96, 132.0-107.8 (m, 4C, pentafluoroethyl groups), 129.8, 129.4, 128.1 (d, <sup>2</sup>*J*<sub>CF</sub> = 6.0 Hz), 127.5 (d, <sup>2</sup>*J*<sub>CF</sub> = 5.3 Hz), 122.8-122.5 (m), 99.2-91.2 (m, 2C), 54.9 (t, <sup>2</sup>*J*<sub>CP</sub> = 6.8 Hz)

<sup>19</sup>F NMR (282 MHz, CDCl<sub>3</sub>) δ -76.8 (d, 3F, <sup>3</sup>*J*<sub>FF</sub> = 14.7 Hz), -77.3 (d, 3F, <sup>3</sup>*J*<sub>FF</sub> = 17.2 Hz), -107.0--113.1 (m, 4F), -155.6 (dt, 1F, <sup>2</sup>*J*<sub>FP</sub> = 61.8, <sup>3</sup>*J*<sub>FF</sub> = 14.1 Hz), -160.0 (d, 1F, <sup>2</sup>*J*<sub>FP</sub> = 83.8 Hz)

<sup>31</sup>P{<sup>1</sup>H} NMR (122 MHz, CDCl<sub>3</sub>) δ 31.6 (dd, <sup>2</sup>*J*<sub>PF</sub> = 81.9, 60.9 Hz)

FT-IR (KBr pellet, cm<sup>-1</sup>) 3067, 2968, 2929, 2862, 2254, 1596, 1509, 1464, 1375, 1359, 1322, 1279, 1227, 1190, 1160, 1087, 1058, 1030, 994, 955, 910, 868, 814, 779, 736, 699, 680, 648.

HRMS(ESI-TOF) Calcd for C<sub>27</sub>H<sub>15</sub>F<sub>12</sub>O<sub>2</sub>P [M-H]<sup>+</sup>: 653.0516, Found: 653.0505

[α]<sub>D</sub><sup>22</sup> = -670.8 (c 0.01, CHCl<sub>3</sub>)

**(3*R*,5*R*)-3,5-difluoro-4-hydroxy-3,5-bis(trifluoromethyl)-3,5-dihydrodi-naphtho[2,1-*c*:1',2'-*e*]p  
hosphepine 4-oxide (17a)**

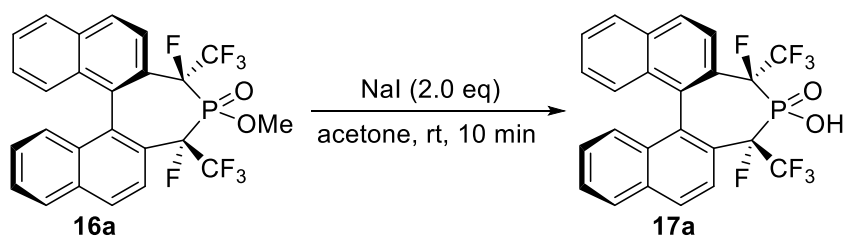

To a stirred mixture of methyl phosphinate (**16a**) (106.1 mg, 0.2 mmol) in acetone (6.0 mL) was added sodium iodide (66.0 mg, 0.4 mmol) at room temperature. The reaction mixture was stirred for 10 min at room temperature, and quenched with 1 M HCl<sub>aq</sub>. The organic layer was extracted with dichloromethane and washed with 1 M HCl<sub>aq</sub>. After the solvent was dried over Na<sub>2</sub>SO<sub>4</sub> and removed *in vacuo*. The resultant residue was purified by silica gel column chromatography on silica gel (dichloromethane/methanol = 20/1 to 10/1). The solution was treated with cation exchange resin (Muromac<sup>®</sup>, 50W-X8). After the solution was filtered, the solvent was removed *in vacuo* to give the corresponding phosphinic acid (**17a**) (79.4 mg, 77%).

<sup>1</sup>H NMR (300 MHz, DMSO-*d*<sub>6</sub>) δ 8.11 (d, 2H, *J* = 9.0 Hz), 8.02 (d, 2H, *J* = 9.0 Hz), 7.71 (d, 2H, *J* = 12.0 Hz), 7.51 (t, 2H, *J* = 7.5 Hz), 7.28 (t, 2H, *J* = 7.5 Hz), 7.00 (d, 2H, *J* = 9.0 Hz)

<sup>13</sup>C{<sup>1</sup>H} NMR (75 MHz, DMSO-*d*<sub>6</sub>) δ 135.6, 132.5, 132.4, 128.3, 127.9, 127.2 (dd, <sup>2</sup>*J*<sub>CF</sub> = 8.3 Hz, <sup>3</sup>*J*<sub>CF</sub> = 3.7 Hz), 127.0 (d, <sup>2</sup>*J*<sub>CF</sub> = 3.7 Hz), 126.8, 126.7, 123.4 (qdd, <sup>1</sup>*J*<sub>CF</sub> = 292.2 Hz, <sup>2</sup>*J*<sub>CF</sub> = 29.4 Hz, <sup>2</sup>*J*<sub>CP</sub> = 4.5 Hz, 2C), 122.4, 97.7-93.4 (m, 2C)

<sup>19</sup>F NMR (282 MHz, DMSO-*d*<sub>6</sub>) δ -86.4 (s, 6F), -154.66 (d, 2F, <sup>2</sup>*J*<sub>FP</sub> = 59.6 Hz)

<sup>31</sup>P{<sup>1</sup>H} NMR (122 MHz, DMSO-*d*<sub>6</sub>) δ 18.0 (t, <sup>2</sup>*J*<sub>PF</sub> = 60.1 Hz)

FT-IR (KBr pellet, cm<sup>-1</sup>) 3666, 3198, 3067, 2250, 1908, 1623, 1507, 1256, 1189, 1038, 908, 806, 736, 560, 524

HRMS(ESI-TOF) Calcd for C<sub>24</sub>H<sub>12</sub>F<sub>8</sub>O<sub>2</sub>P [M-H]<sup>-</sup>: 515.0447, Found: 515.0453

[α]<sub>D</sub><sup>23</sup> = 114.9 (*c* 0.45, CHCl<sub>3</sub>)

**(3*R*,5*R*,11*bR*)-3,5-difluoro-4-hydroxy-3,5-bis(perfluoroethyl)-3,5-dihydrodinaphtho[2,1-*c*:1',2'-*e*]phosphepine 4-oxide (**17b**)**

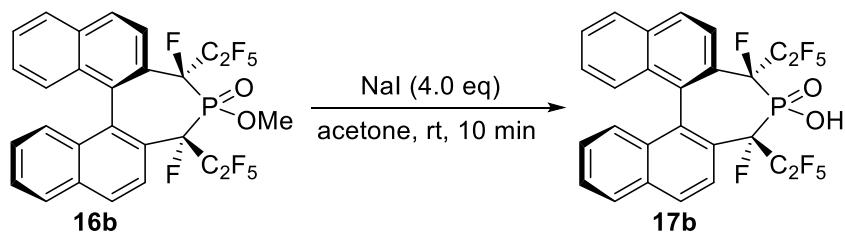

To a stirred mixture of methyl phosphinate (**16b**) (11.0 mg, 0.018 mmol) in acetone (1.5 mL) was added sodium iodide (10.8 mg, 0.072 mmol) at room temperature. The reaction mixture was stirred for 10 min at room temperature, and quenched with 1 M HCl<sub>aq</sub>. The organic layer was extracted with dichloromethane and washed with 1 M HCl<sub>aq</sub>. After the solvent was dried over Na<sub>2</sub>SO<sub>4</sub>, the solution was treated with cation exchange resin (Muromac<sup>®</sup>, 50W-X8). After the solution was filtered, the solvent was removed *in vacuo* to give the corresponding phosphinic acid (**17b**) (10.0 mg, 93%).

<sup>1</sup>H NMR (300 MHz, acetone-*d*<sub>6</sub>) δ 8.04 (d, 2H, *J* = 9.2 Hz), 8.01 (d, 2H, *J* = 8.5 Hz), 7.89 (d,

2H,  $J = 9.0$  Hz), 7.53 (t, 2H,  $J = 7.3$  Hz), 7.29 (t, 2H,  $J = 7.6$  Hz), 7.19 (d, 2H,  $J = 9.0$  Hz)

$^{19}\text{F}$  NMR (282 MHz, acetone- $d_6$ )  $\delta$  -78.1 (s, 6F), -110.7 (d, 2F,  $^2J_{\text{FF}} = 288.2$  Hz), -112.7 (d, 2F,  $^2J_{\text{FF}} = 288.5$  Hz) -157.40 (d, 2F,  $^2J_{\text{FP}} = 61.5$  Hz)

$^{31}\text{P}\{^1\text{H}\}$  NMR (122 MHz, acetone- $d_6$ )  $\delta$  20.4 (t,  $^2J_{\text{PF}} = 57.6$  Hz)

### Typical procedure for catalytic asymmetric Friedel-Crafts reaction<sup>8,9</sup>

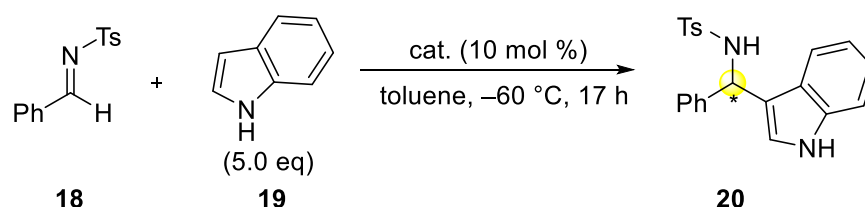

To a stirred mixture of (*E*)-*N*-Benzylidene-4-methylbenzenesulfonamide (**18**) (25.9 mg, 0.10 mmol) in toluene (0.4 mL) was added chiral catalyst (0.01 mmol) at -60 °C. After stirred for 10 min, indole (58.6 mg, 0.50 mmol) was added in one portion. The reaction mixture was stirred for 17 h at -60 °C and quenched with sat. aqueous  $\text{NH}_4\text{Cl}$  at 0 °C. After extraction with ethyl acetate. The organic layer was washed with brine. The solvent was dried over  $\text{Na}_2\text{SO}_4$  and removed *in vacuo*. The resultant residue was purified by silica gel column chromatography (hexane/ethyl acetate = 2/1) to give the corresponding tosylamide (**20**).

$^1\text{H}$  NMR (300 MHz,  $\text{CDCl}_3$ )  $\delta$  8.01 (s, 1H), 7.55 (d, 2H,  $J = 8.3$  Hz), 7.29 (d, 1H,  $J = 8.2$  Hz), 7.26 (s, 1H), 7.26-7.13 (m, 6H), 7.09 (d, 2H,  $J = 8.0$  Hz), 7.00 (ddd, 1H,  $J = 8.8, 7.0, 0.9$  Hz), 6.66 (d, 1H,  $J = 2.0$  Hz), 5.85 (d, 1H,  $J = 6.9$  Hz), 5.13 (d, 1H,  $J = 6.9$  Hz), 2.36 (s, 3H)

$^{13}\text{C}\{^1\text{H}\}$  NMR (75 MHz,  $\text{CDCl}_3$ )  $\delta$  143.1, 140.3, 137.5, 136.6, 132.3, 129.3, 128.4, 127.5, 127.3, 125.4, 123.9, 122.7, 120.1, 119.4, 116.5, 111.3, 55.1, 21.6

HPLC (column, CHIRALPAK OD-3, Hexane/2-propanol = 70/30, flow rate 1.0 mL/min, 20°C, detection UV 254 nm)  $t_R$  of major isomer 13.1 min,  $t_R$  of minor isomer 8.7 min.

$[\alpha]_{\text{D}}^{21} = -833.1$  ( $c$  0.003,  $\text{CHCl}_3$ , 64% *ee*)

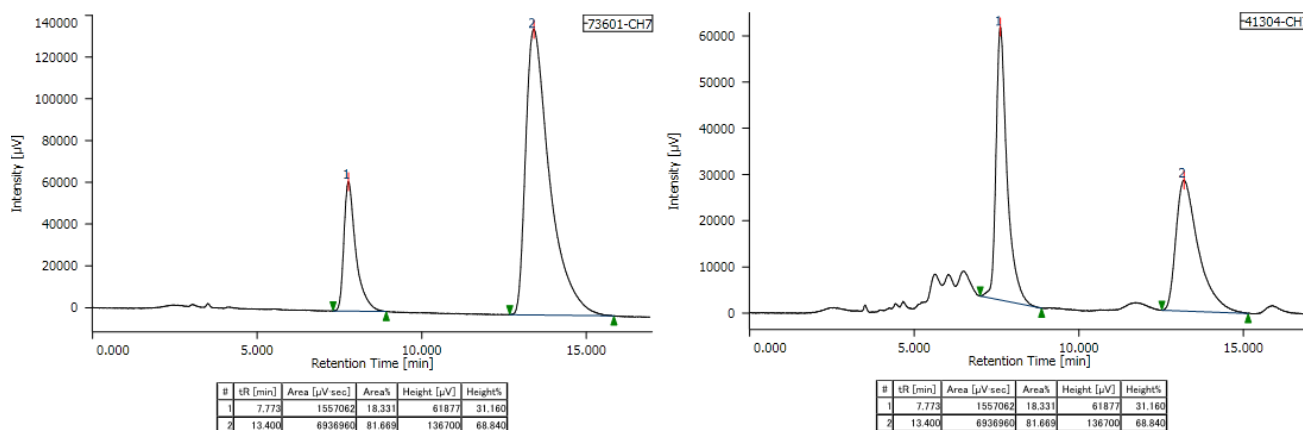

**X-ray crystallography of 16b (racemic):**

X-ray diffraction data were collected on a Rigaku RAXIS-Rapid diffractometer. The structures were solved by a direct method (SHELXL-2014).<sup>10</sup> The X-ray structure solution and refinement were carried out using the Yadokari-XG software.<sup>11</sup>

C<sub>27</sub>H<sub>15</sub>F<sub>12</sub>O<sub>2</sub>P<sub>2</sub>, colorless prisms (CH<sub>2</sub>Cl<sub>2</sub>, 20 °C),  $M_w = 630.36$ , crystal dimensions =  $0.300 \times 0.280 \times 0.220$  mm<sup>3</sup>, triclinic, space group *P*-1 (#2),  $a = 10.0113(6)$ ,  $b = 11.5797(7)$ ,  $c = 12.0978(7)$  Å,  $\alpha = 77.512(2)$ ,  $\beta = 84.456(2)$ ,  $\gamma = 64.458(1)^\circ$ ,  $V = 1235.46(13)$  Å<sup>3</sup>,  $Z = 2$ ,  $\lambda = 0.71073$  Å,  $T = 128$  K,  $\rho_{\text{calcd}} = 1.694$  g cm<sup>-3</sup>,  $\mu_{\text{MoK}\alpha} = 0.229$  mm<sup>-1</sup>,  $F_{000} = 632$ , 12050 total reflections ( $2\theta_{\text{max}} = 54.88^\circ$ ), index ranges =  $-12 \leq h \leq 12$ ,  $-15 \leq k \leq 15$ ,  $-15 \leq l \leq 15$ , 5521 unique reflections ( $R_{\text{int}} = 0.0283$ ),  $R1 = 0.0465$  ( $I > 2\sigma(I)$ ), 0.0575 (all data),  $wR2 = 0.1335$  ( $I > 2\sigma(I)$ ), 0.1459 (all data),  $S = 1.069$  (439 parameters).



## References

- (1) Uraguchi, D.; Terada, M. *J. Am. Chem. Soc.* **2004**, *126*, 5356–5357.
- (2) Vyas, D. J.; Fröhlich, R.; Oestreich, M. *Org. Lett.* **2011**, *13*, 2094–2097.
- (3) Clyne, D. S.; Jin, J.; Genest, E.; Gallucci, J. C.; RajanBabu, T. V. *Org. Lett.* **2000**, *2*, 1125–1128.
- (4) Ying, X.; Zhenxing, L.; Peiyuan, Q.; Rui, G.; Yan, Z.; Jianbo, W. *Angew. Chem. Int. Ed.* **2012**, *51*, 5714–5717.
- (5) Vasse, J.-L.; Stranne, R.; Zalubovskis, R.; Gayet, C.; Moberg, C. *J. Org. Chem.* **2003**, *68*, 3258–3270.
- (6) Prakash, G. K. S.; Krishnamurti, R.; Olah, G. A. *J. Am. Chem. Soc.* **1989**, *111*, 393–395.
- (7) Gassman, P. G.; O'reilly, N. J. *J. Org. Chem.* **1987**, *52*, 2481–2490.
- (8) Xing, C.-H.; Liao, Y.-X.; Ng, J.; Hu, Q.-S. *J. Org. Chem.* **2011**, *76*, 4125–4131.
- (9) Kang, Q.; Zhao, Z.-A.; You, S.-L. *J. Am. Chem. Soc.* **2007**, *129*, 1484–1485.
- (10) Sheldrick, G.; Schneider, T. *Acta Cryst. C* **2015**, *71*, 3.
- (11) Yadokari-XG, Software for Crystal Structure Analyses, Wakita K. (2001); Release of Software (Yadokari-XG 2009) for Crystal Structure Analyses, Kabuto, C.; Akine, S.; Nemoto, T.; Kwon, E. *J. Cryst. Soc. Jpn.* **2009**, *51*, 218.

$^1\text{H}$  NMR: **5**  
(DMSO- $d^6$ )

8.052  
8.028  
8.005  
7.632  
7.604  
7.483  
7.459  
7.433  
7.291  
7.264  
7.240  
7.025  
6.997

3.125  
3.079  
3.063  
3.016  
2.716  
2.669  
2.663  
2.615

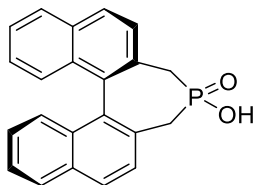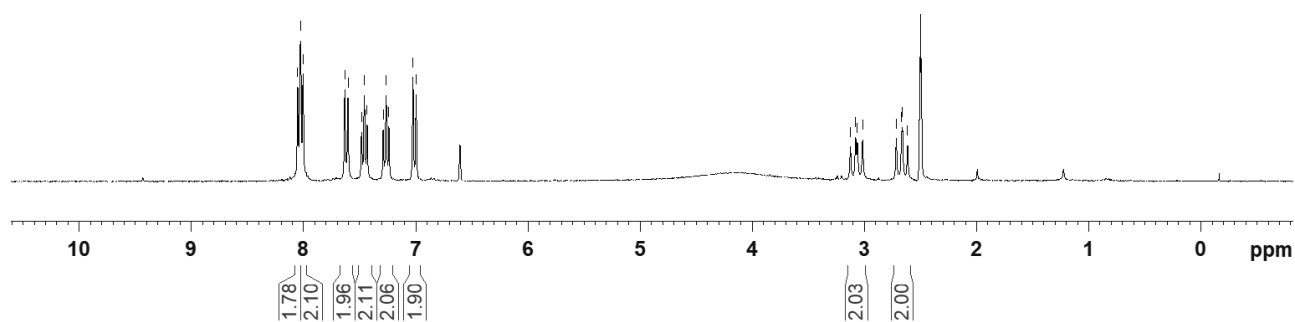

$^{13}\text{C}\{^1\text{H}\}$  NMR: **5**  
(DMSO- $d^6$ )

132.794  
132.735  
132.084  
132.049  
131.725  
131.611  
131.547  
131.517  
128.593  
128.403  
128.309  
126.081  
125.358

36.078  
34.930

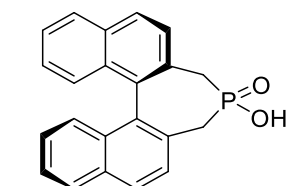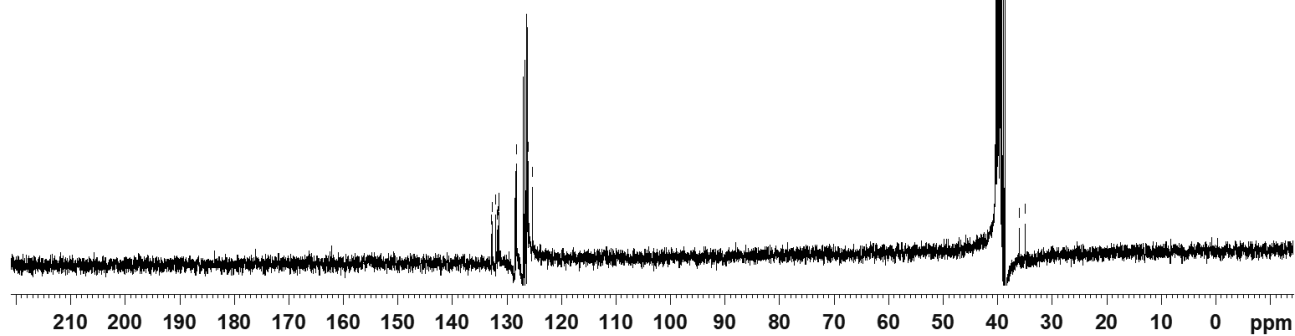

$^{31}\text{P}\{^1\text{H}\}$  NMR: **5**

(DMSO- $d^6$ )

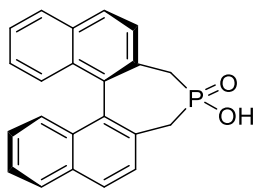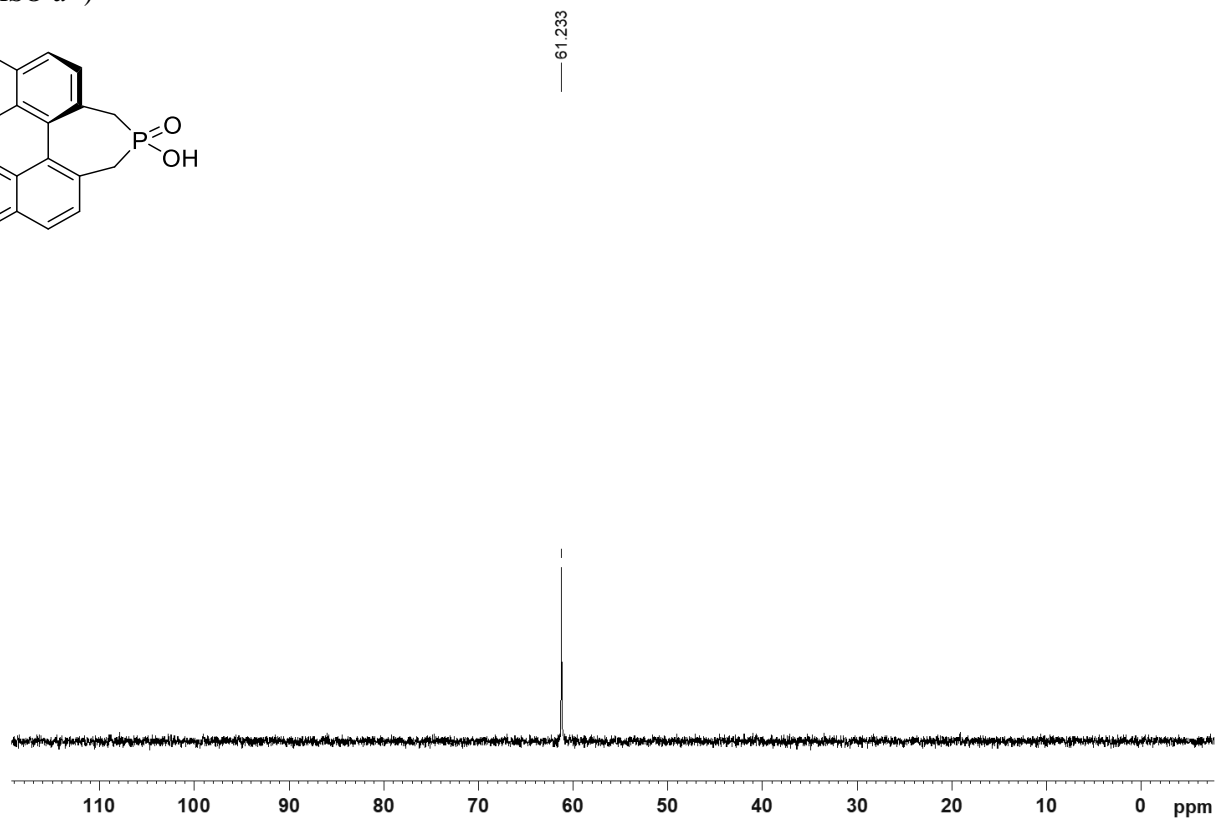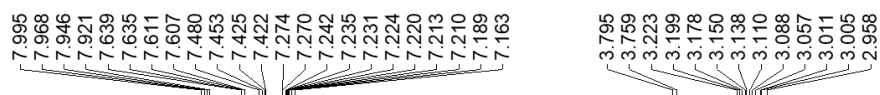

$^1\text{H}$  NMR: **6**

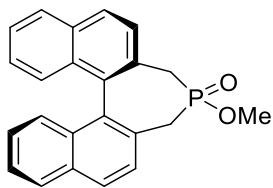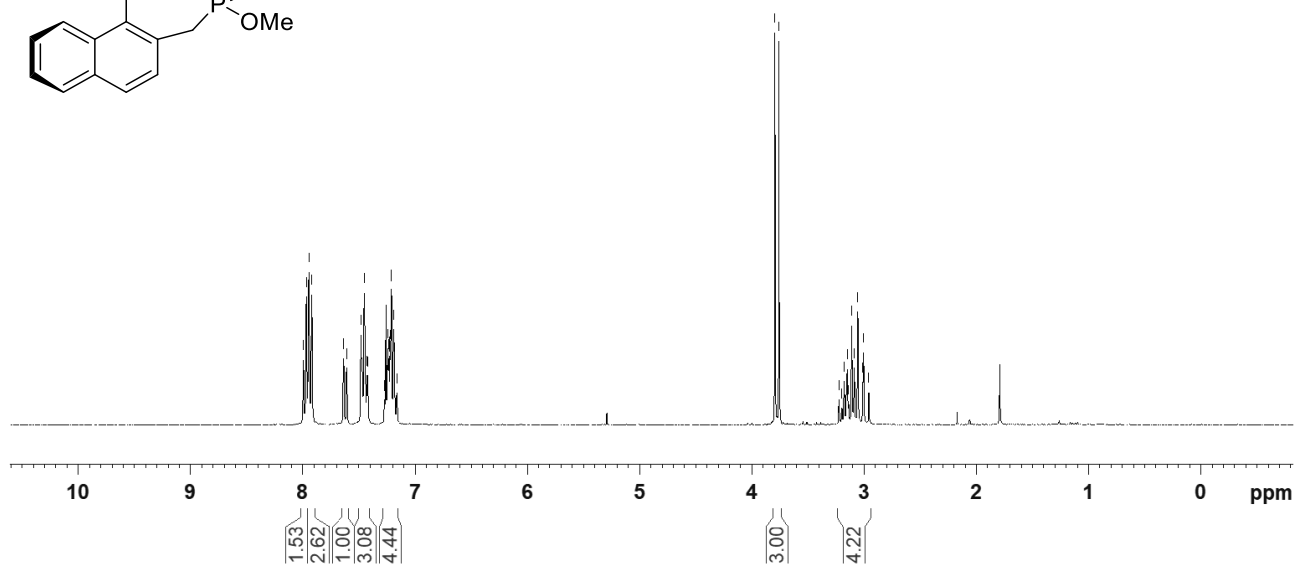

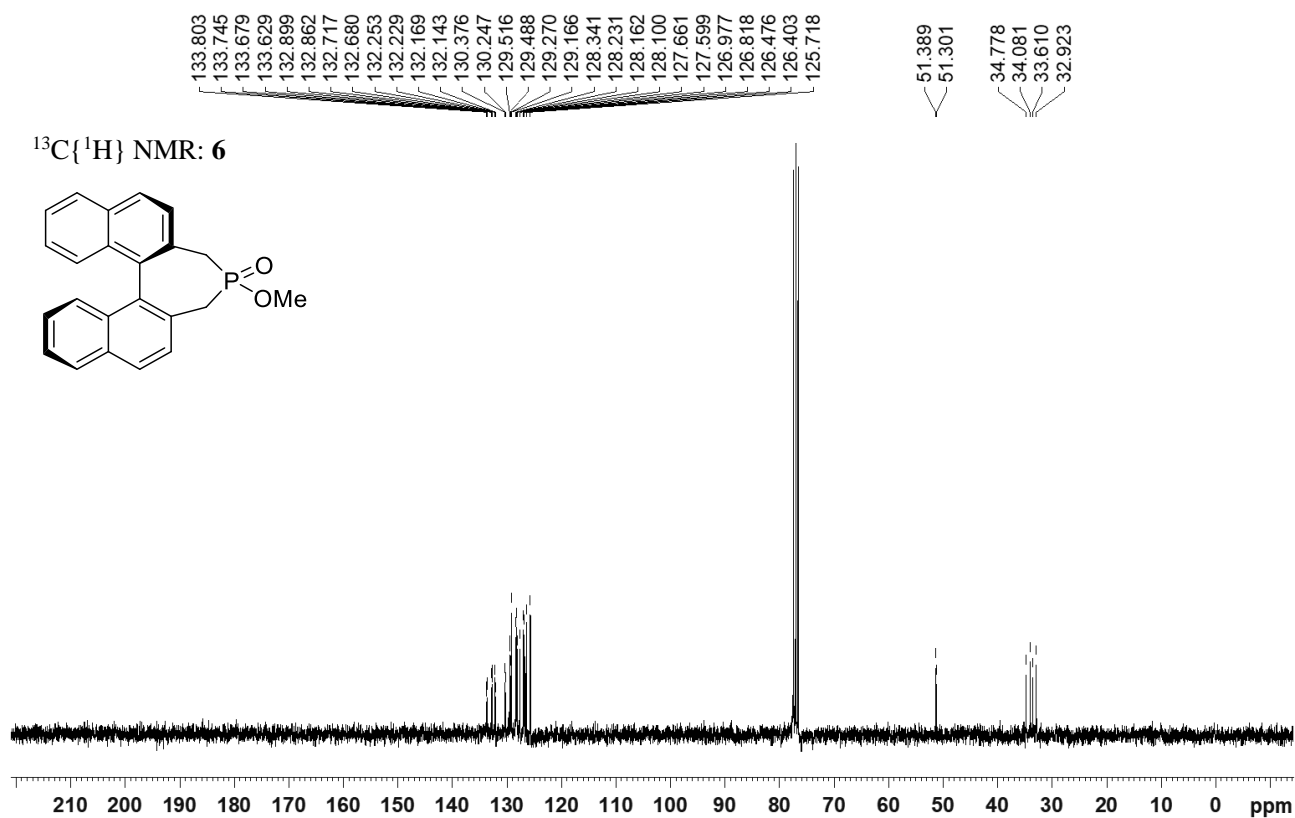

$^{31}\text{P}\{^1\text{H}\}$  NMR: **6**

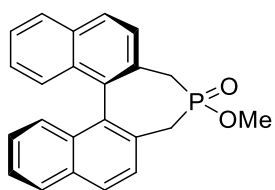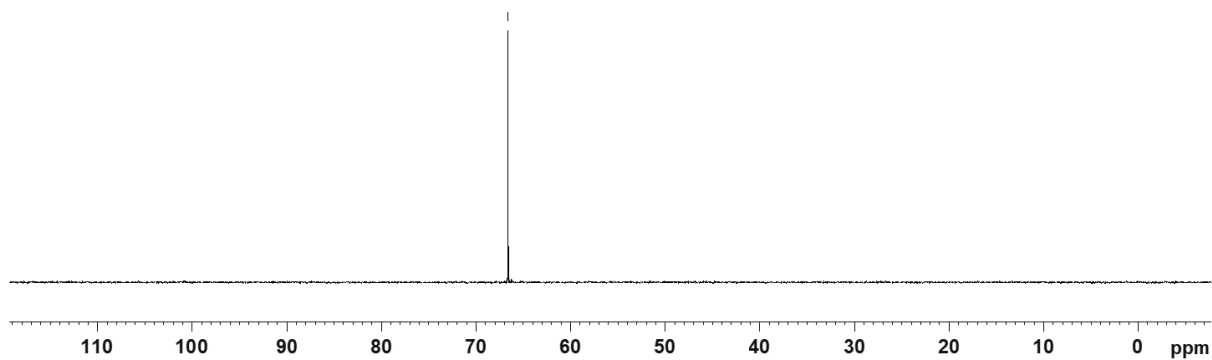

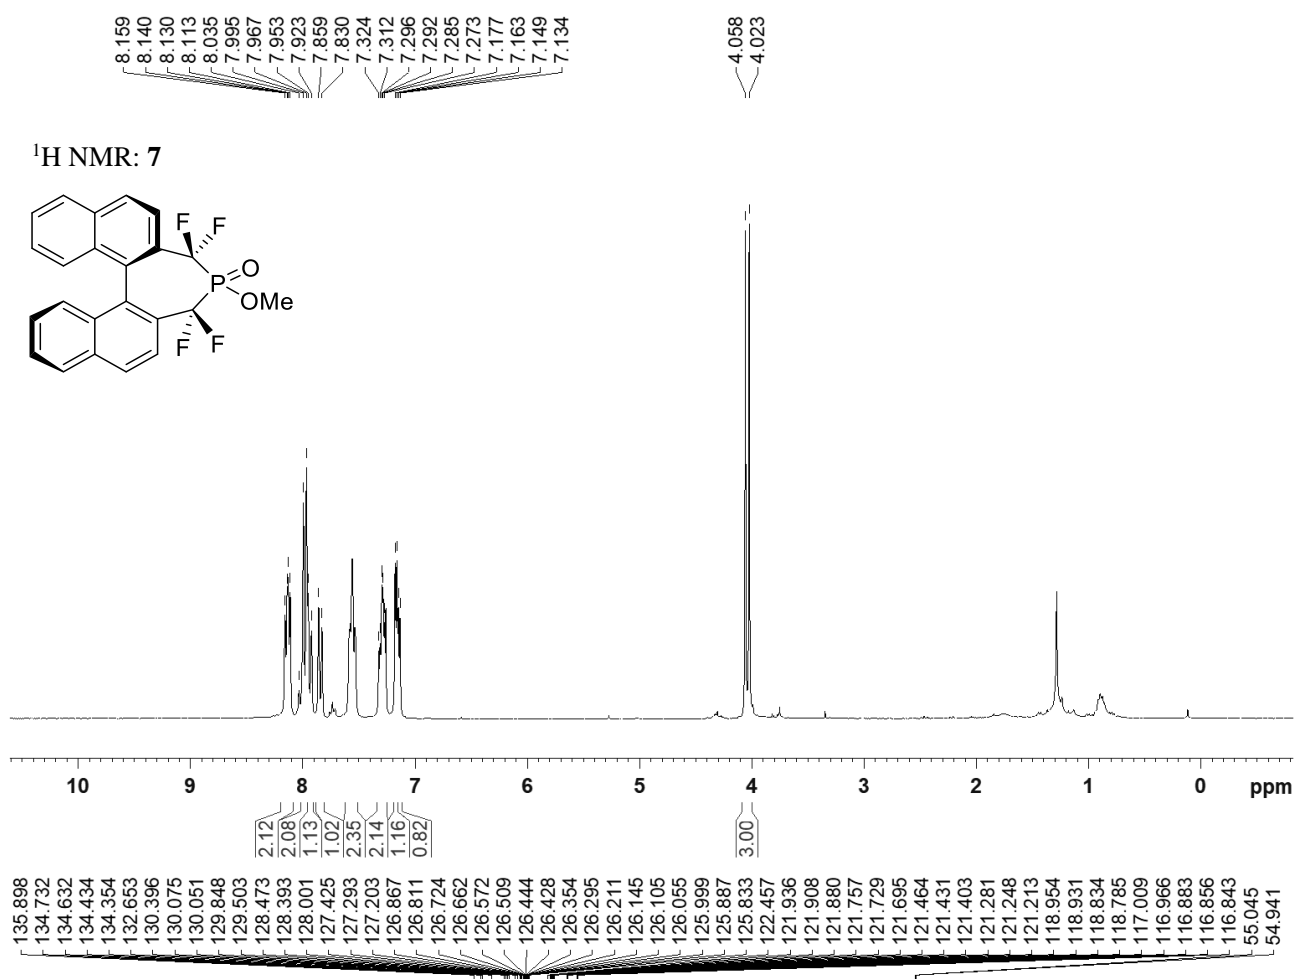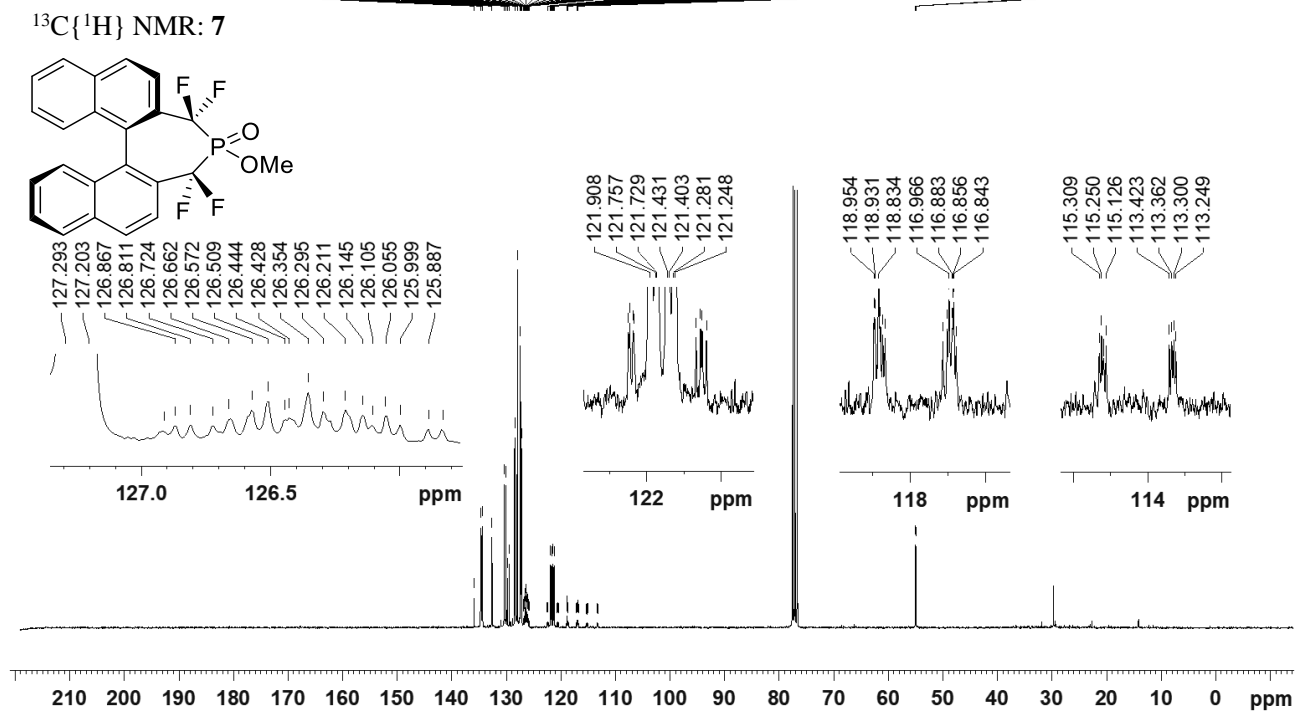

$^{19}\text{F}$  NMR: **7**

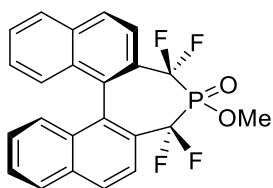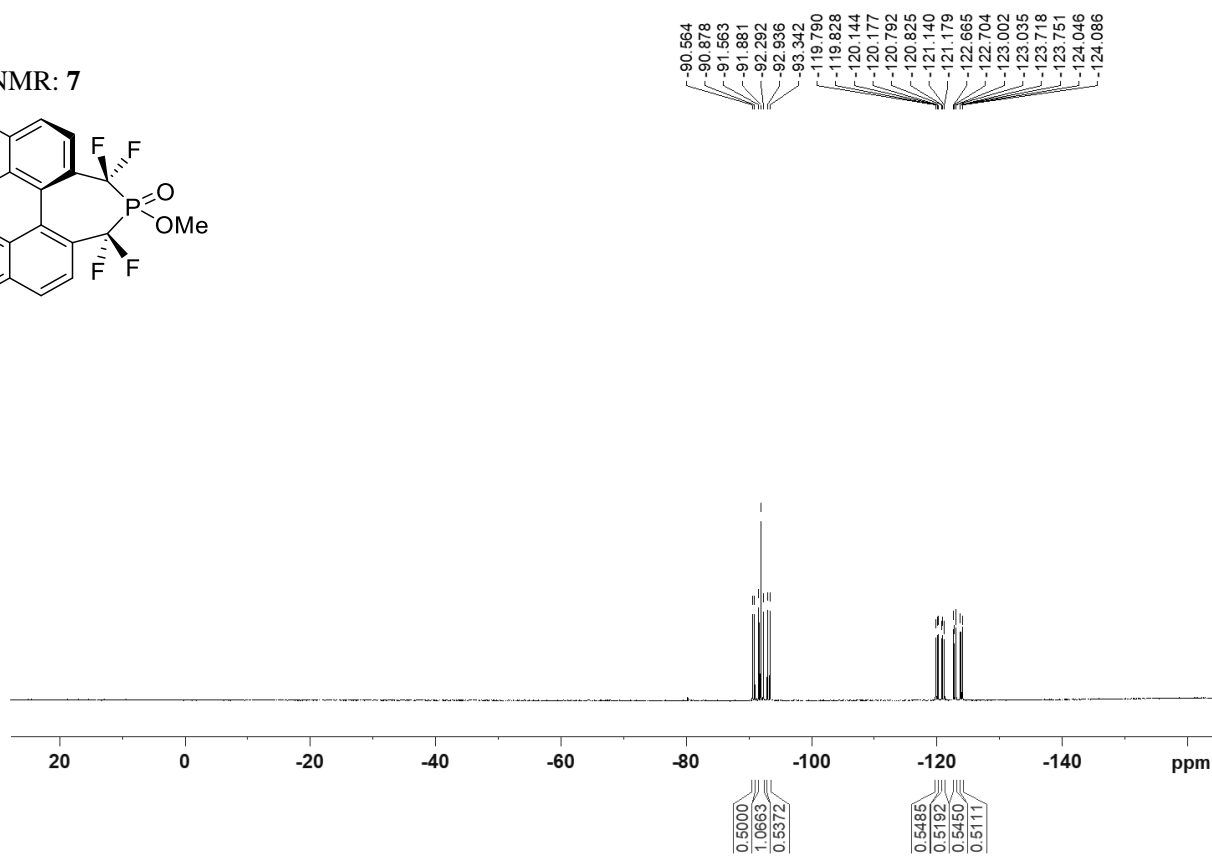

$^{31}\text{P}\{^1\text{H}\}$  NMR: **7**

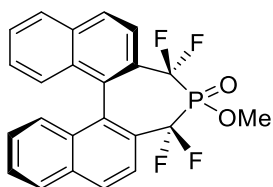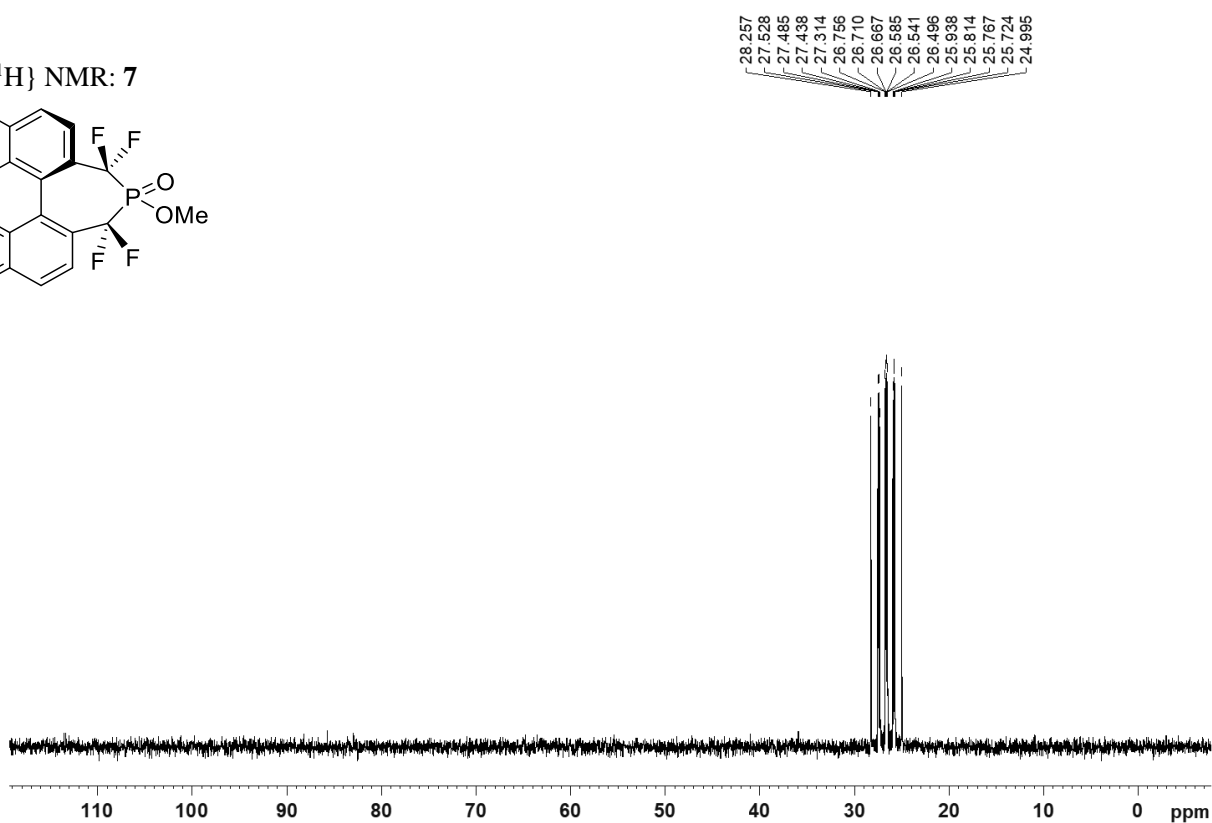

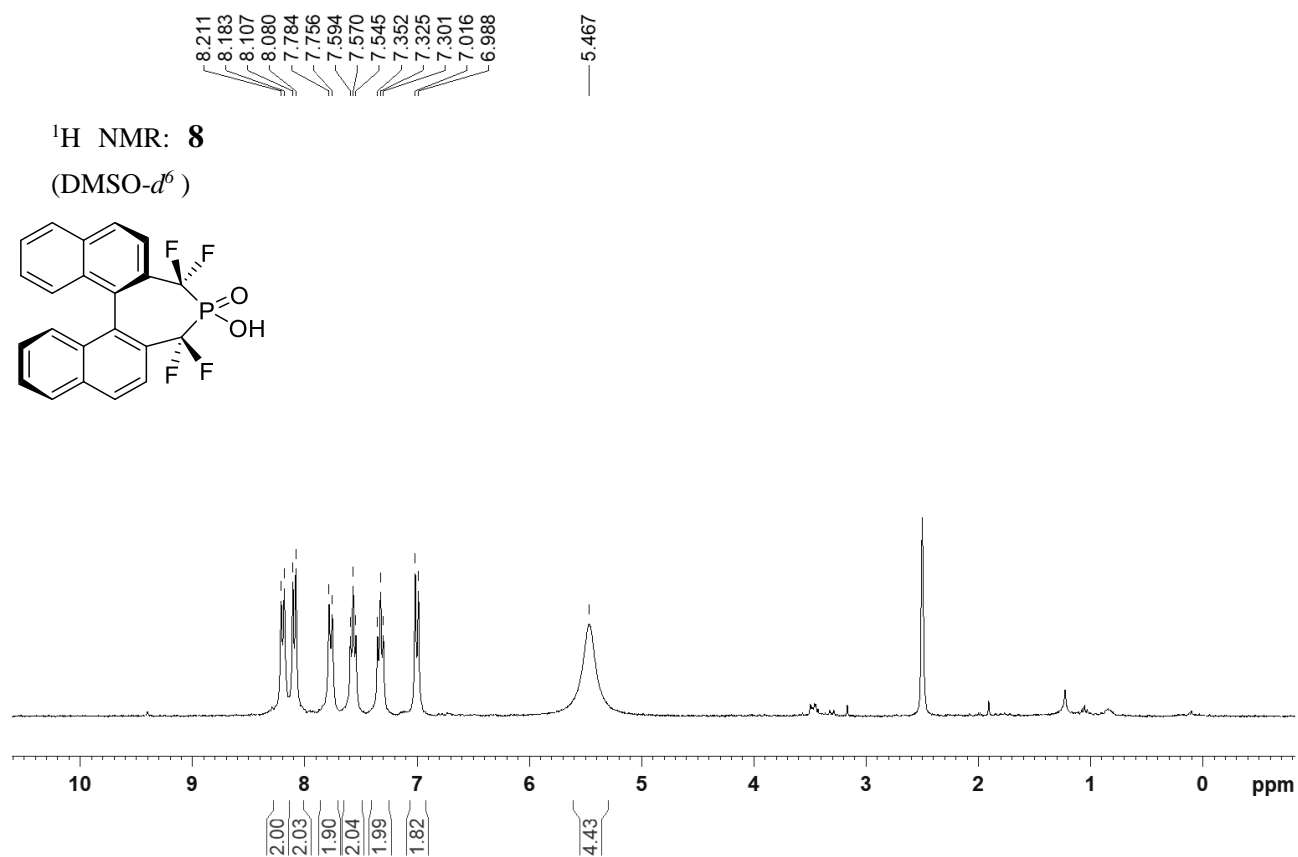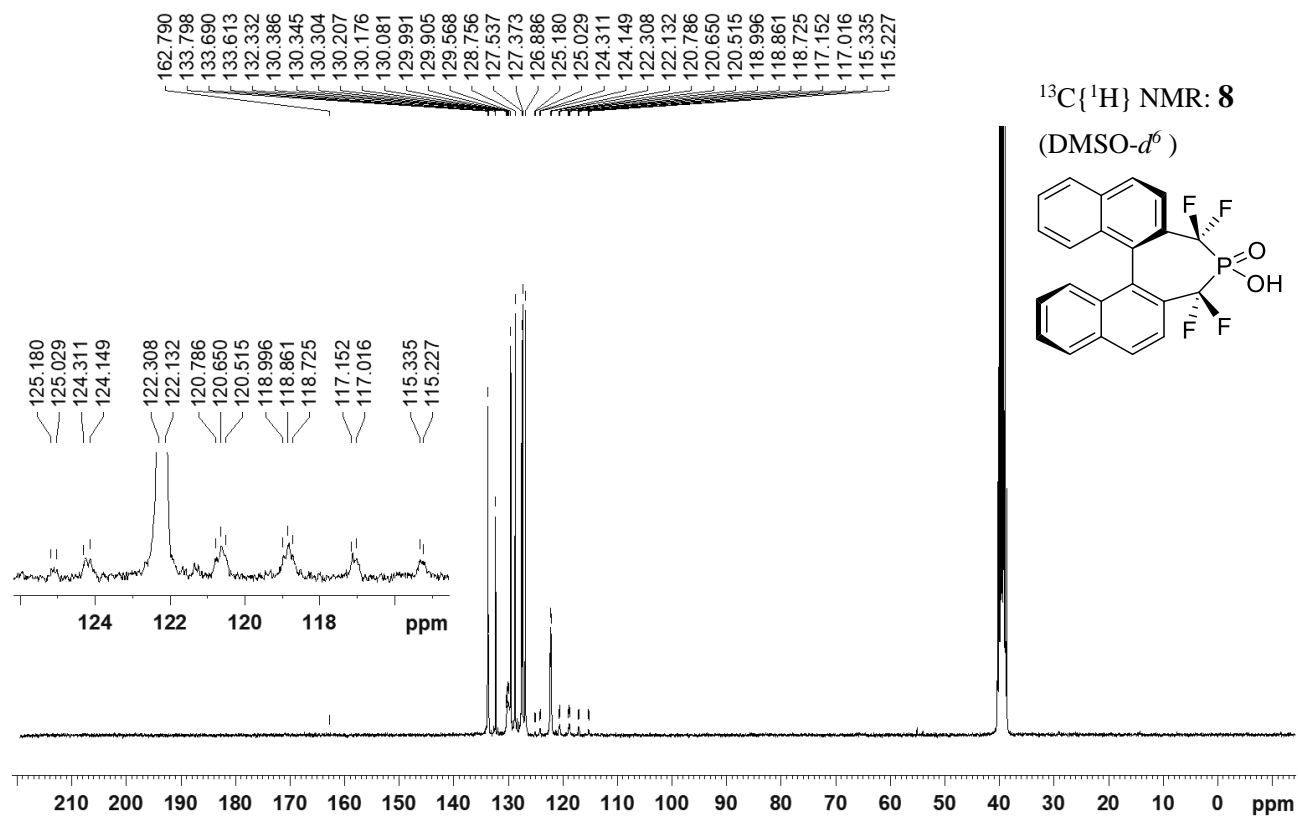

$^{19}\text{F}$  NMR: **8**

( $\text{DMSO}-d^6$ )

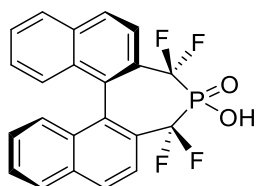

-85.286  
-85.581  
-86.277  
-86.572

-118.749  
-119.060  
-119.742  
-120.055

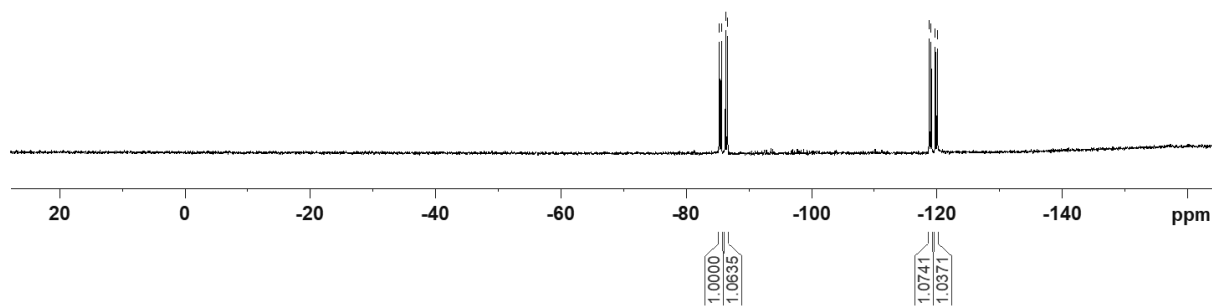

23.033  
22.331  
21.630  
20.923  
20.218

$^{31}\text{P}\{^1\text{H}\}$  NMR: **8**

( $\text{DMSO}-d^6$ )

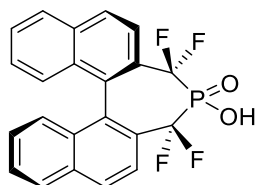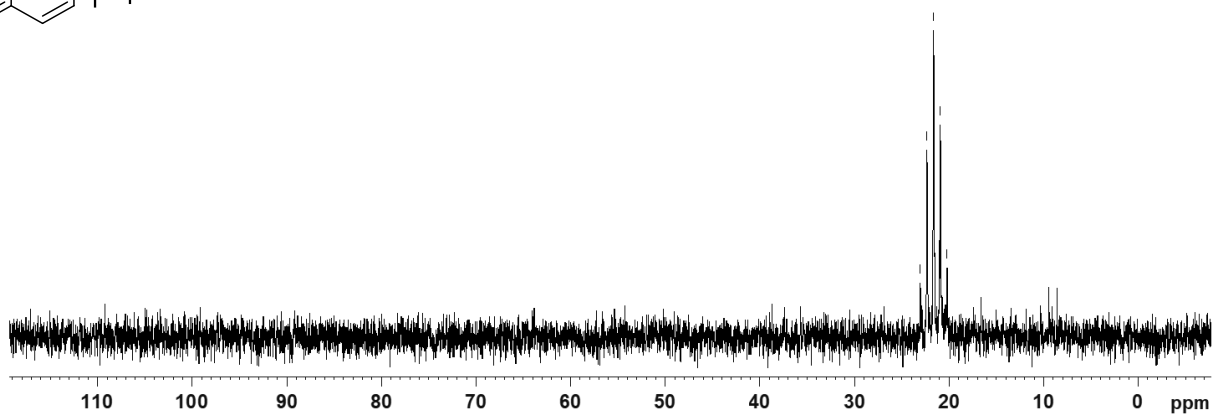



8.158  
8.139  
8.123  
8.023  
7.995  
7.647  
7.644  
7.624  
7.621  
7.597  
7.594  
7.348  
7.344  
7.325  
7.321  
7.316  
7.297  
7.293  
7.071  
7.042

$^1\text{H}$  NMR: **12a**

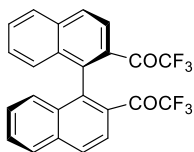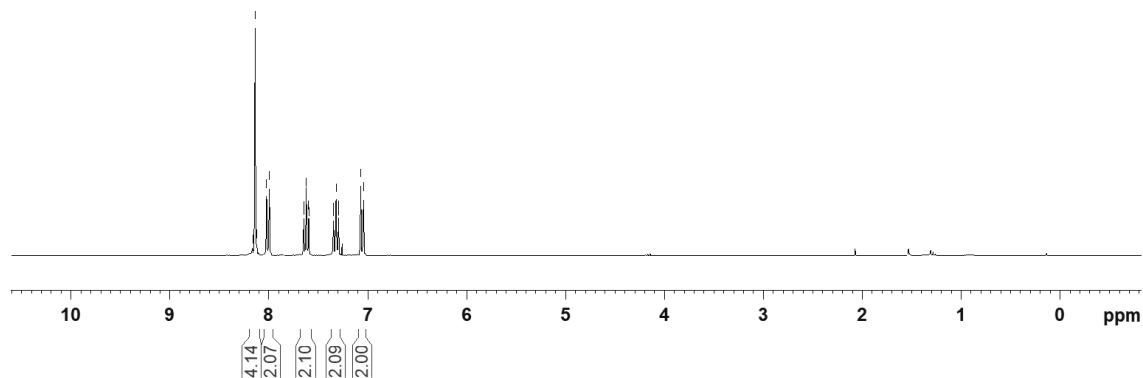

182.140  
181.678  
181.215  
180.753  
141.179  
135.684  
132.881  
129.465  
128.929  
128.367  
127.903  
127.257  
127.137  
124.136  
124.085  
124.033  
123.984  
122.227  
118.353  
114.474  
110.597

$^{13}\text{C}\{^1\text{H}\}$  NMR: **12a**

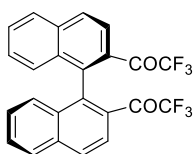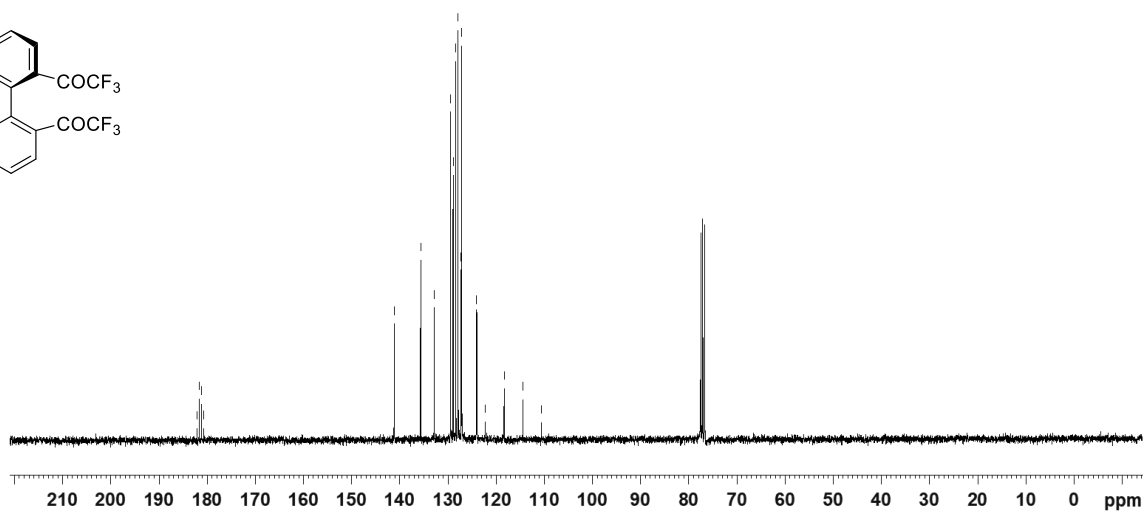

<sup>19</sup>F NMR: **12a**

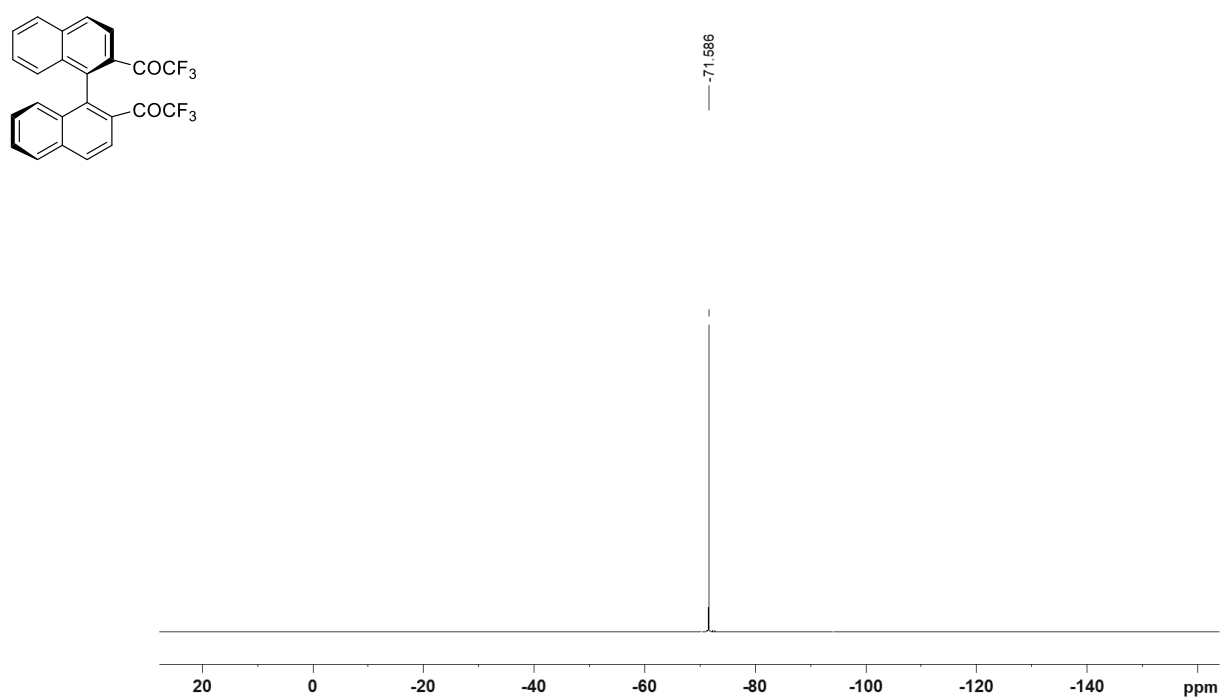

<sup>1</sup>H NMR: **12b**

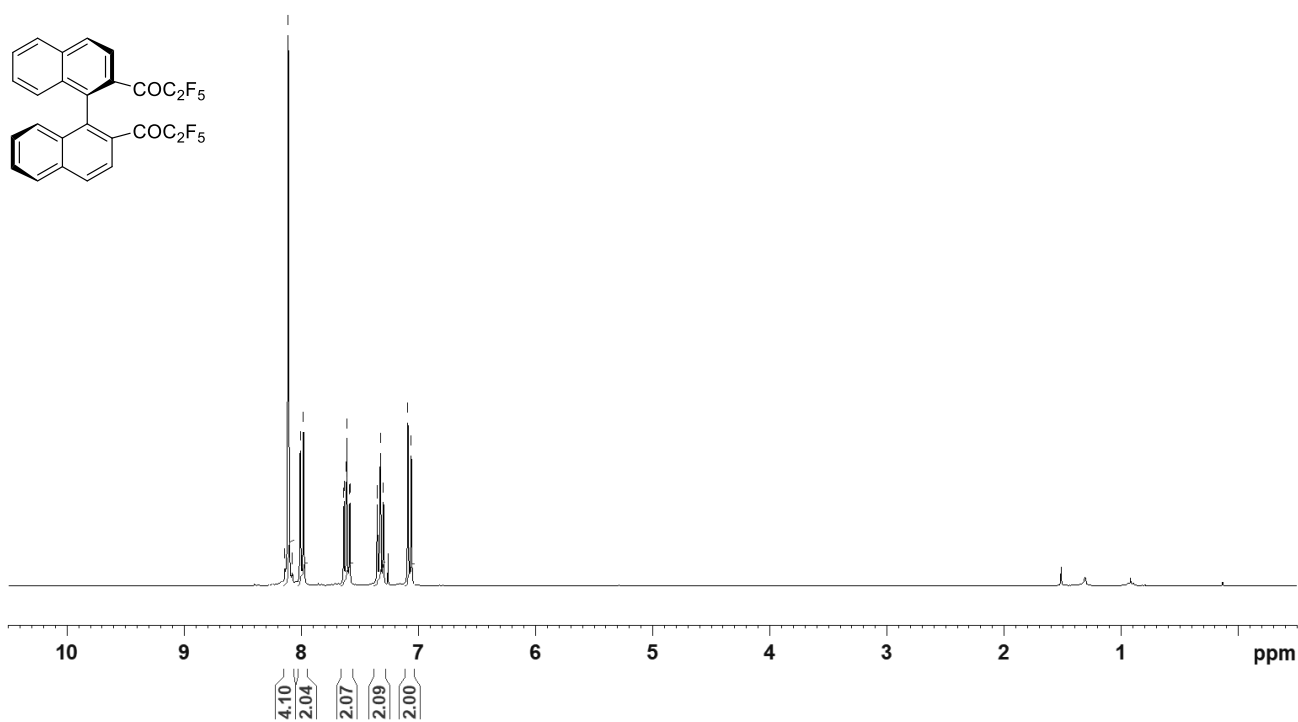

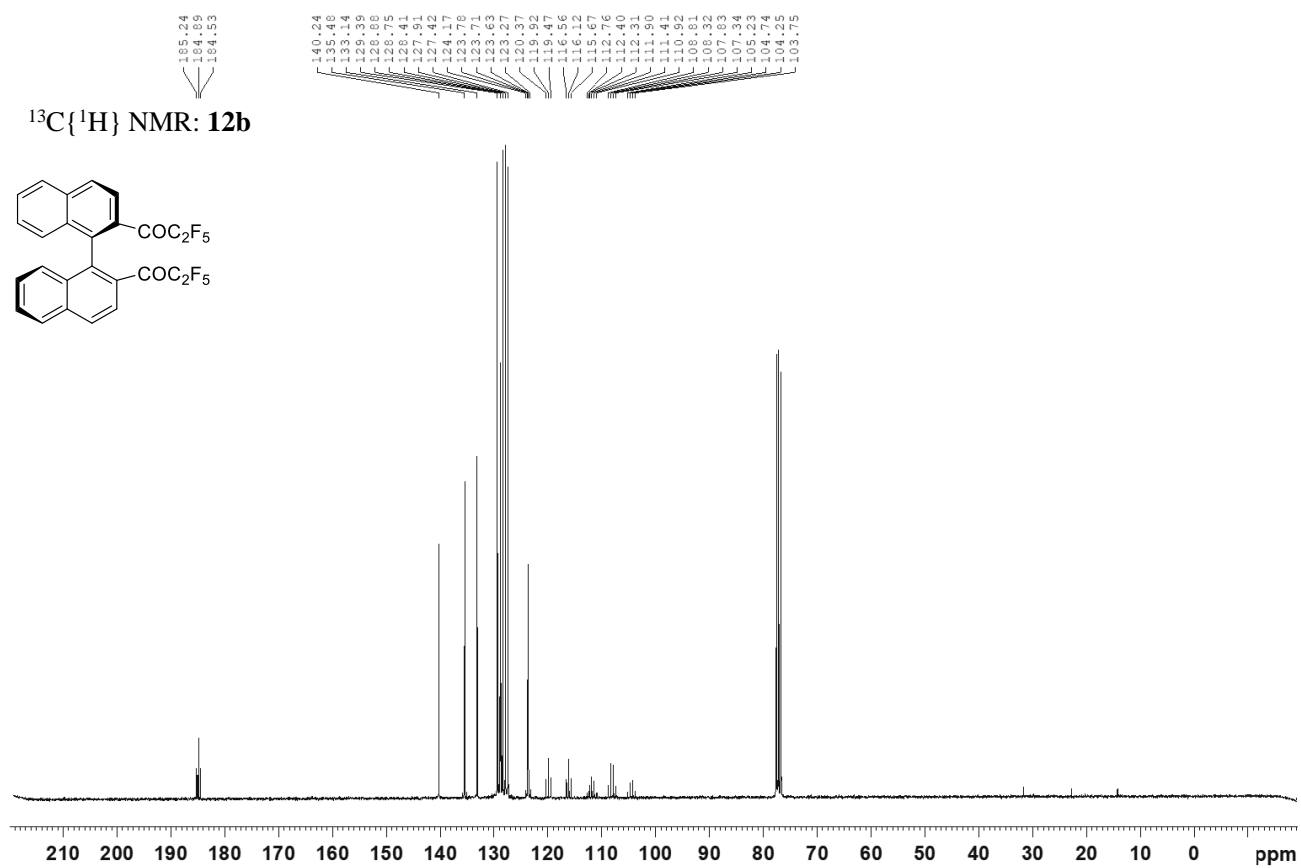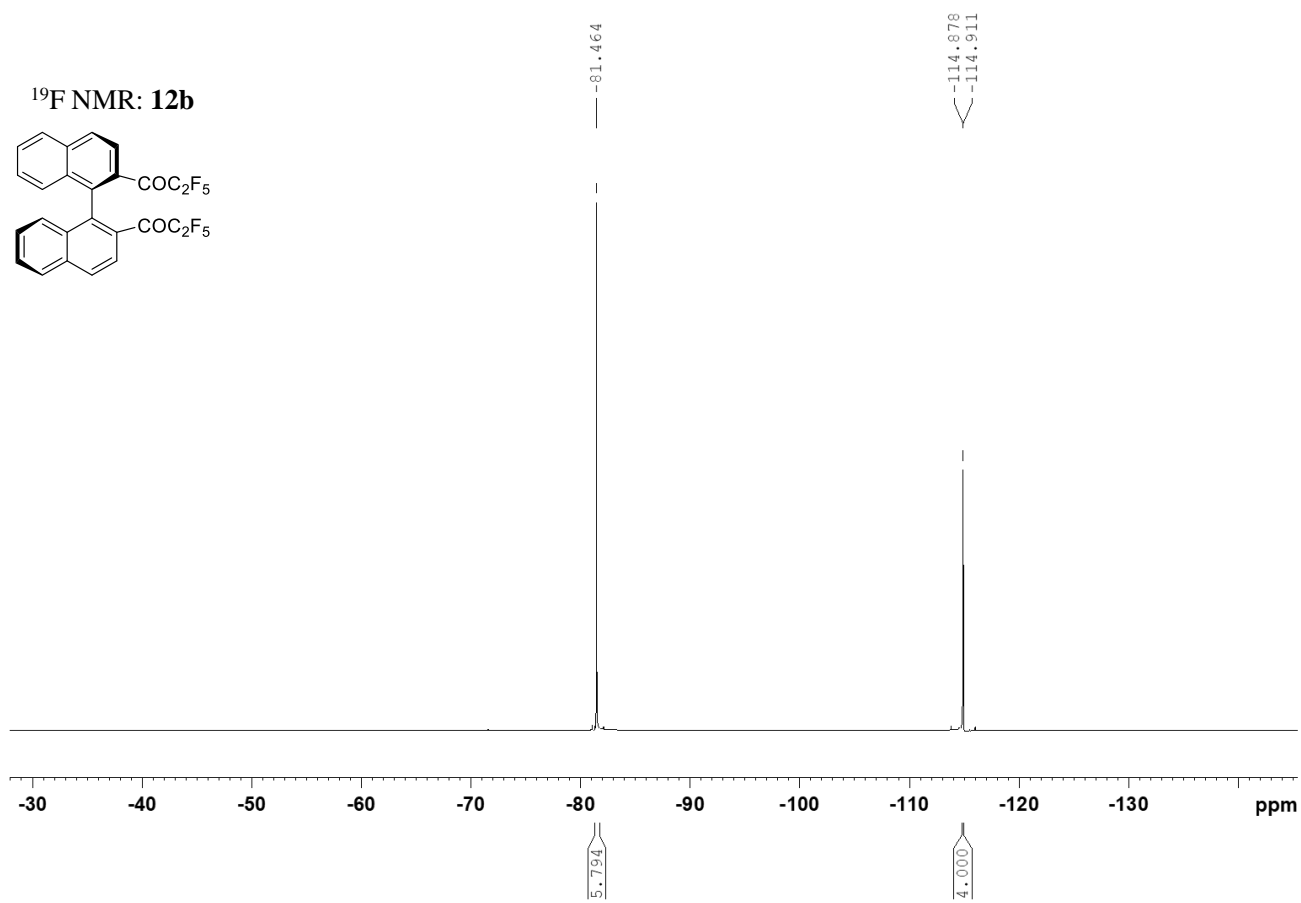

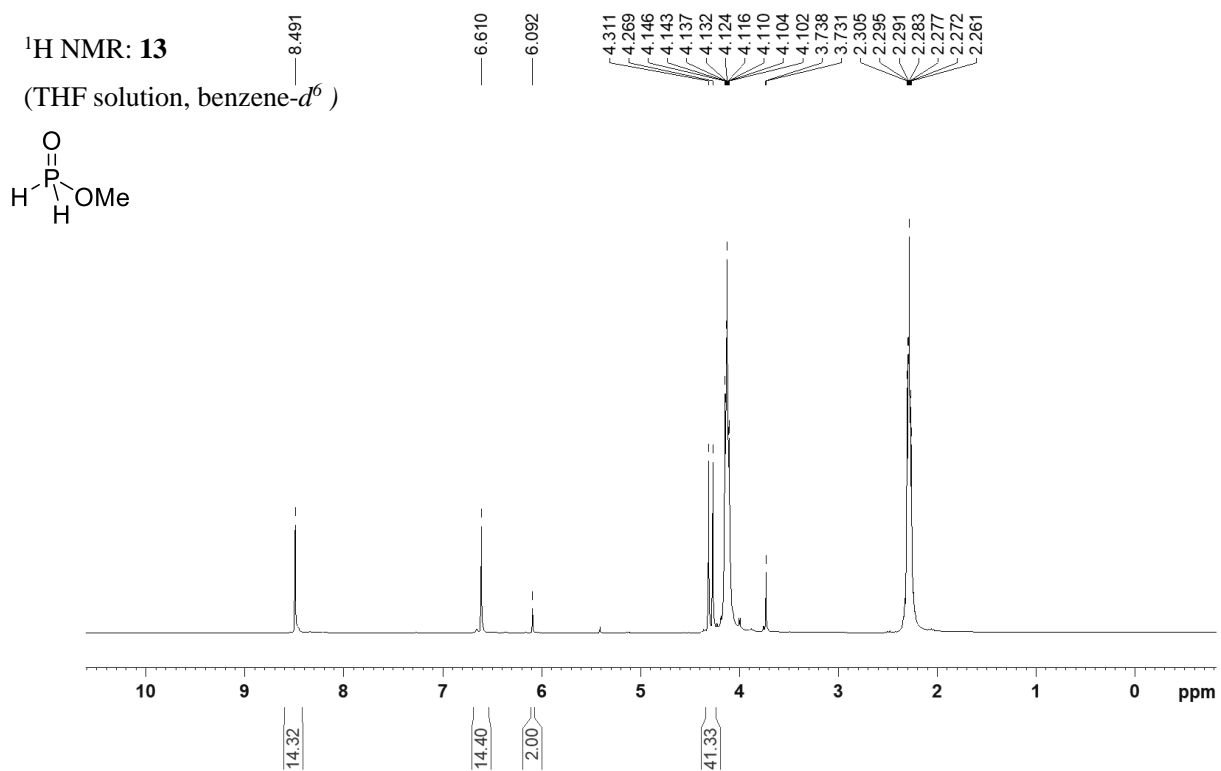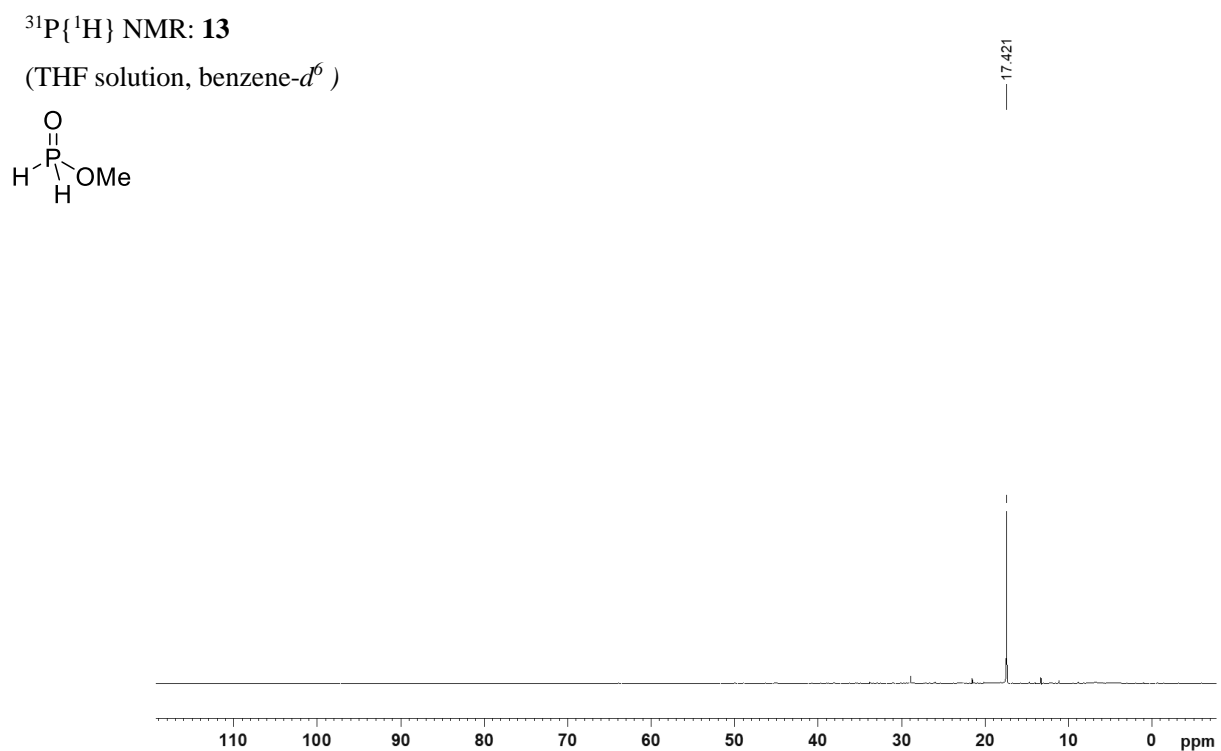

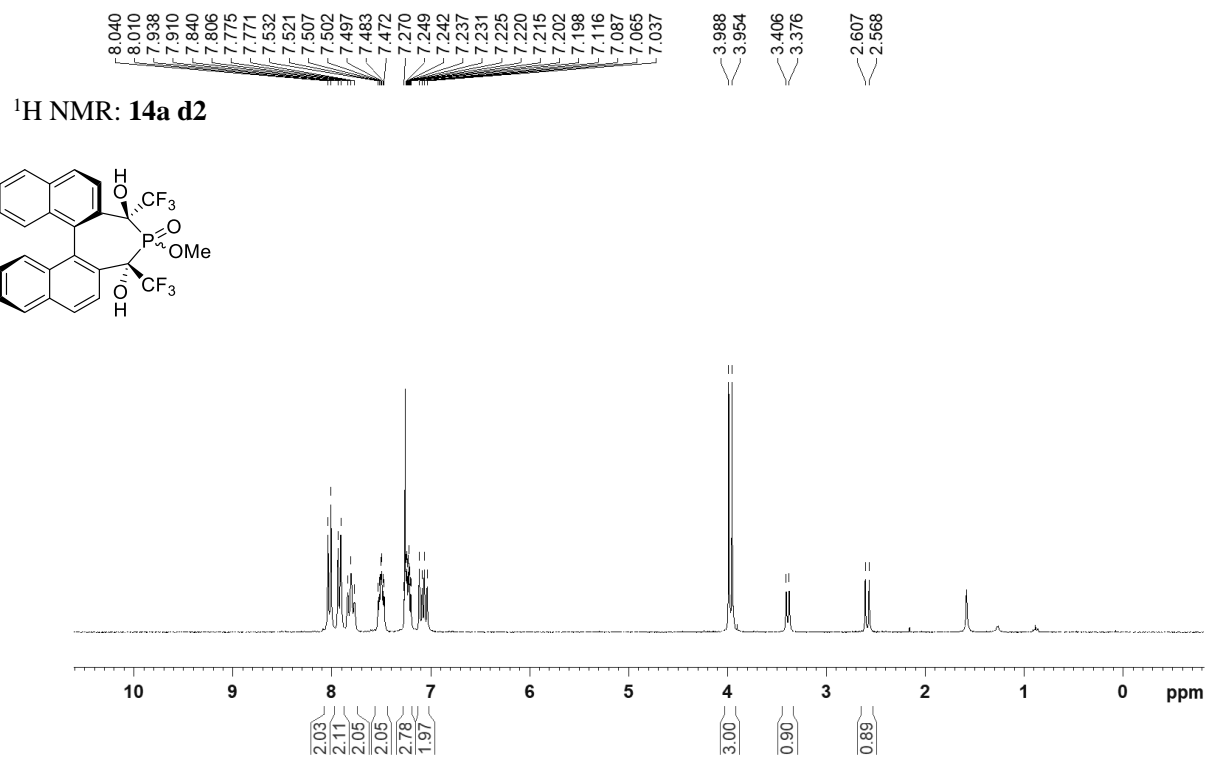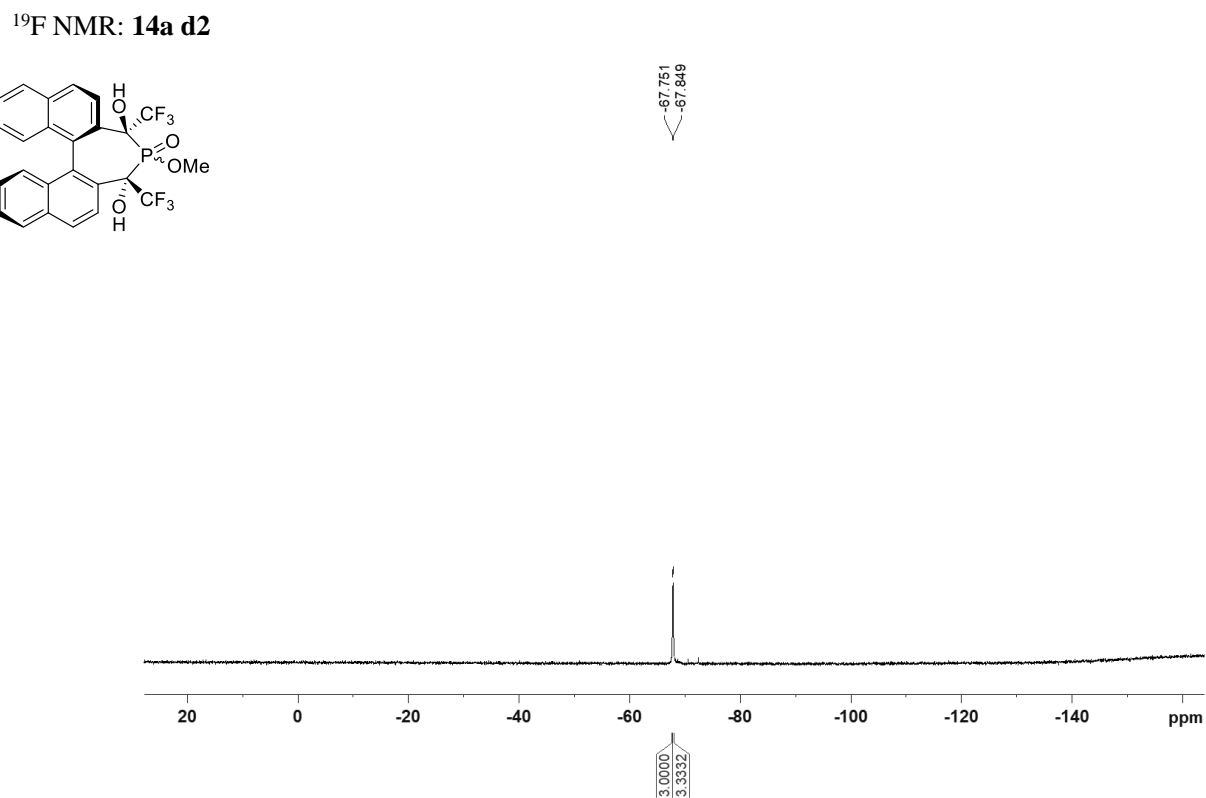

$^{31}\text{P}\{^1\text{H}\}$  NMR: **14a d2**

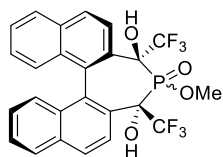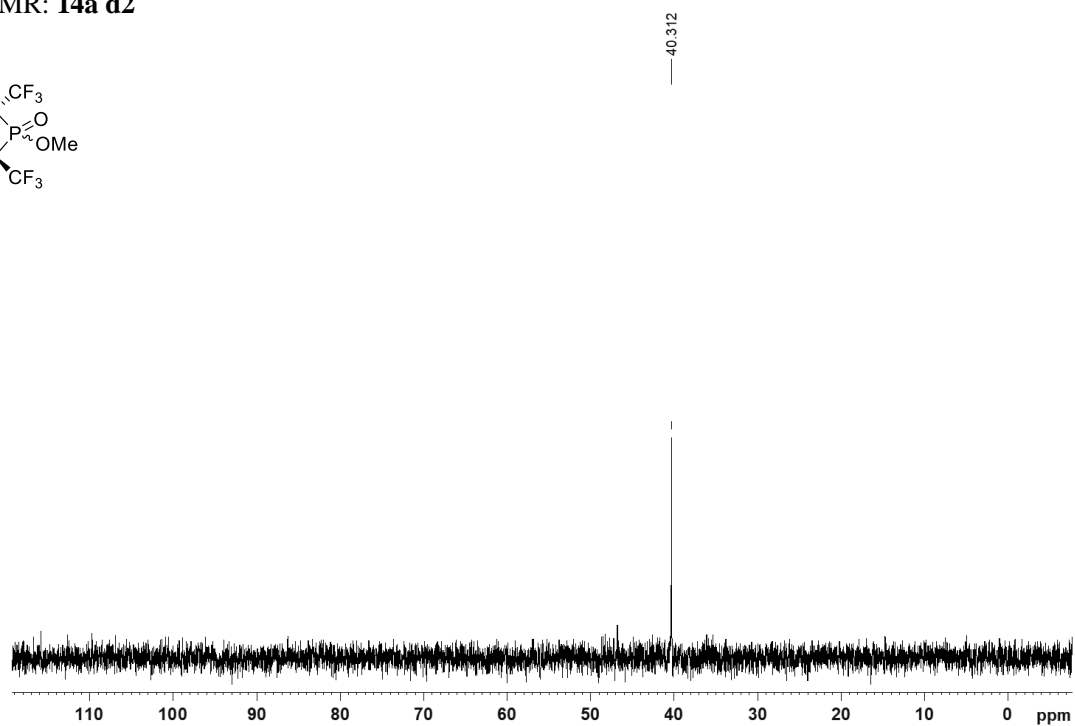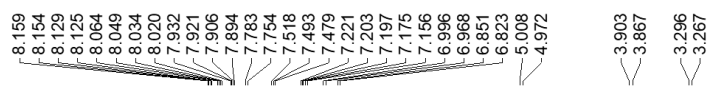

$^1\text{H}$  NMR: **14a d3**

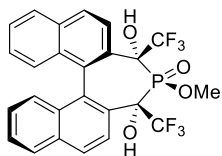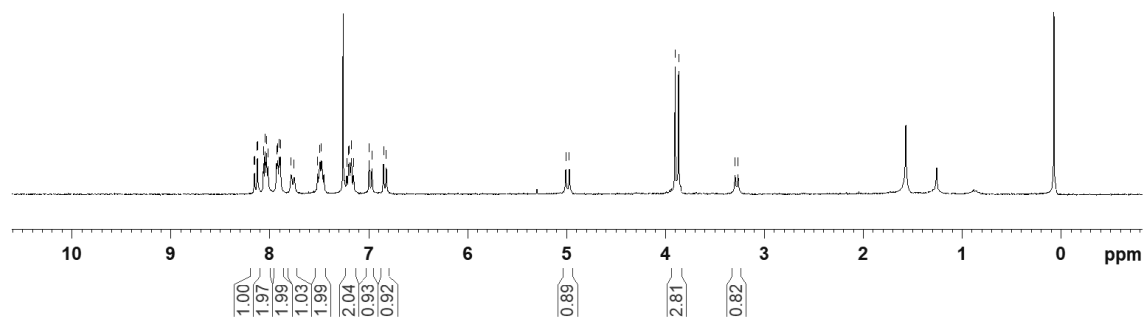

<sup>19</sup>F NMR: **14a d3**

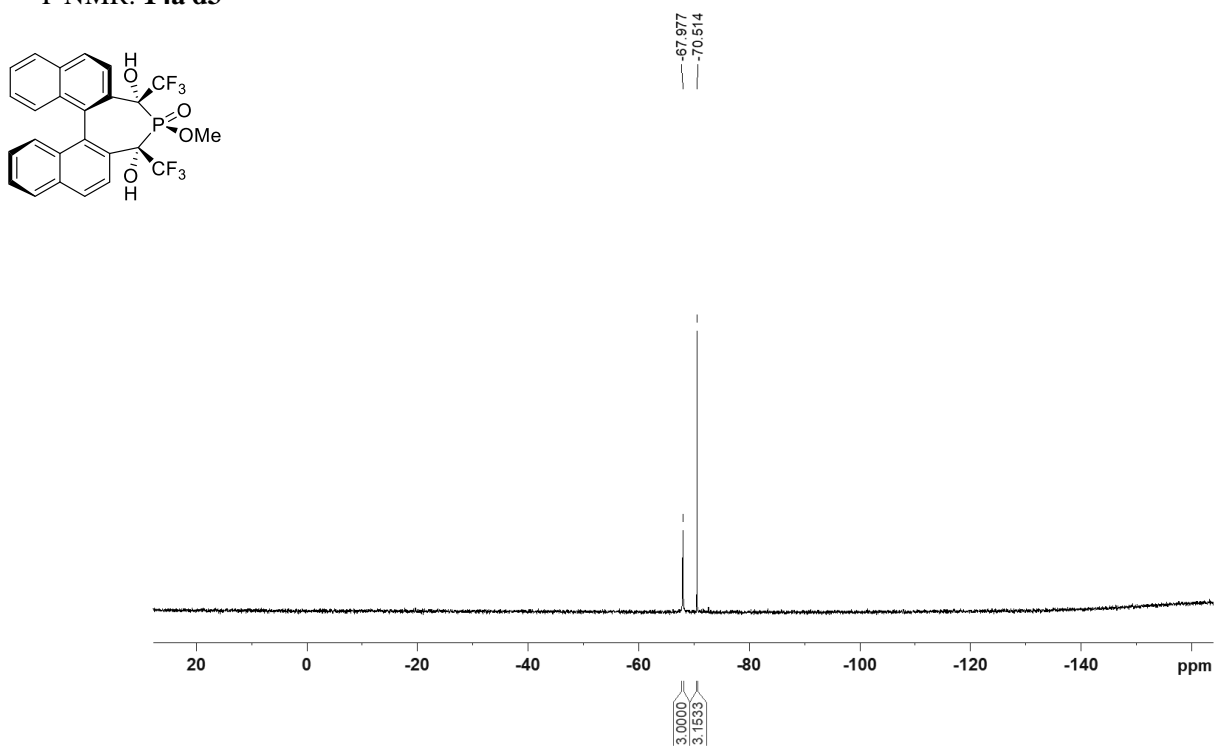

<sup>31</sup>P{<sup>1</sup>H} NMR: **14a d3**

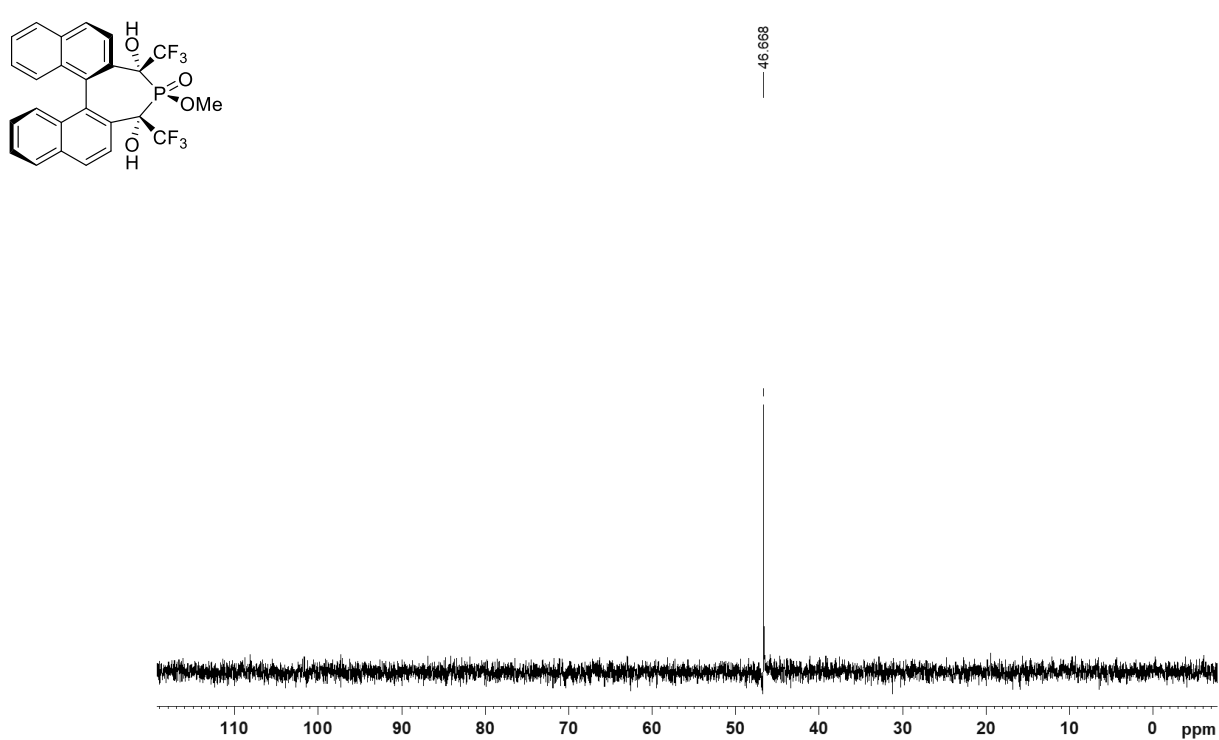

<sup>1</sup>H NMR: **13b d1**

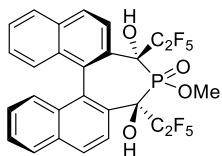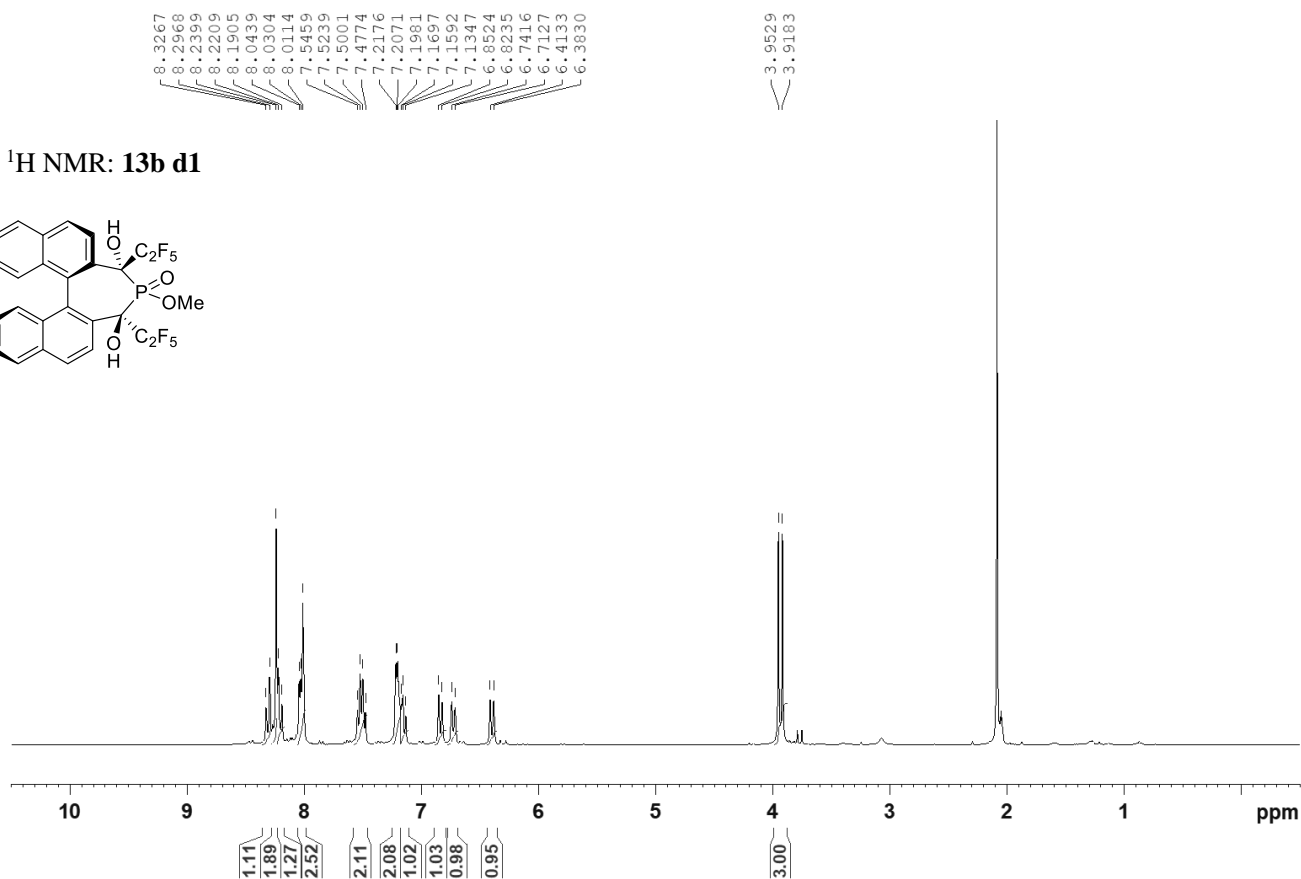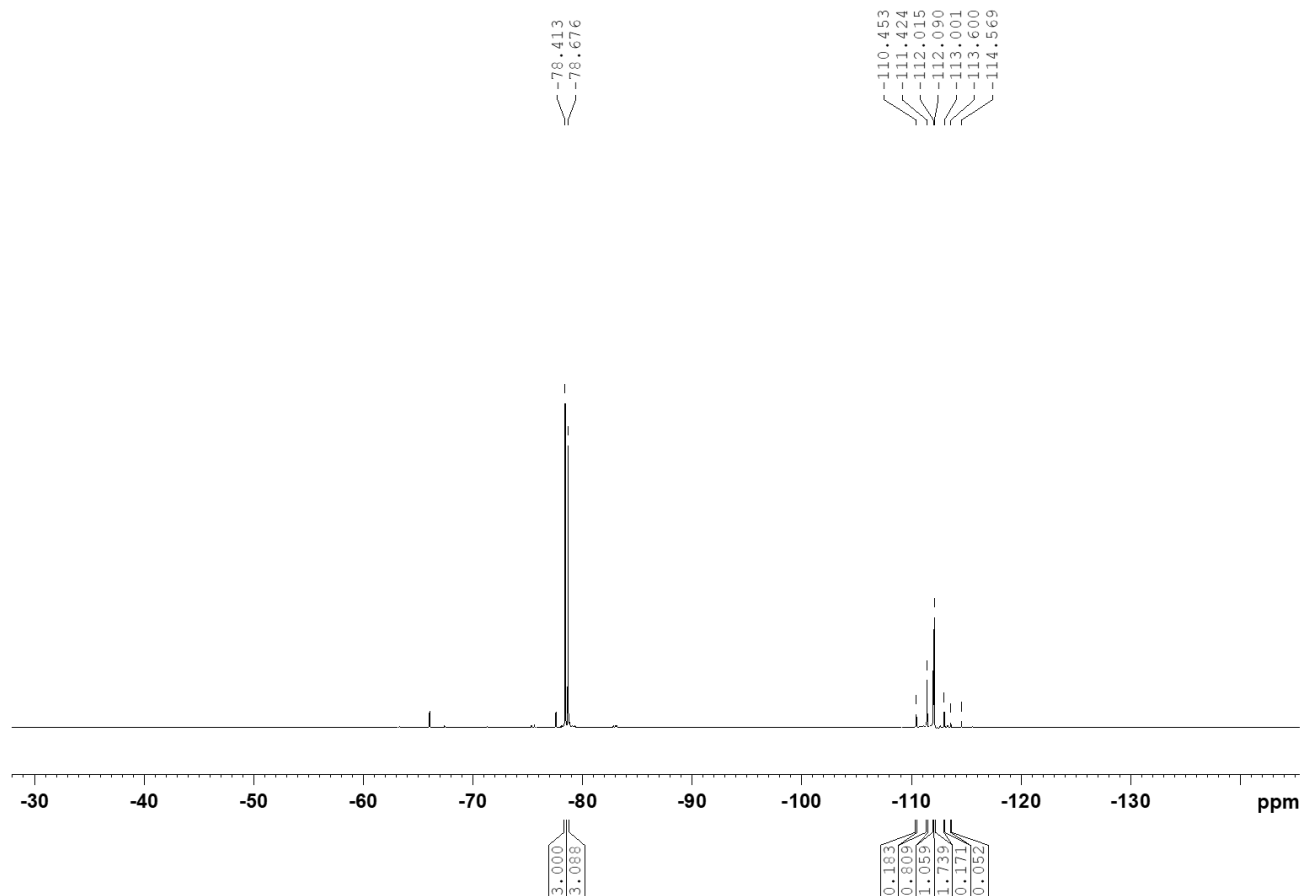



$^{31}\text{P}\{^1\text{H}\}$  NMR: **13b d1**

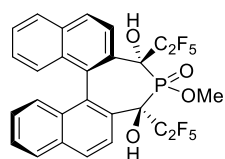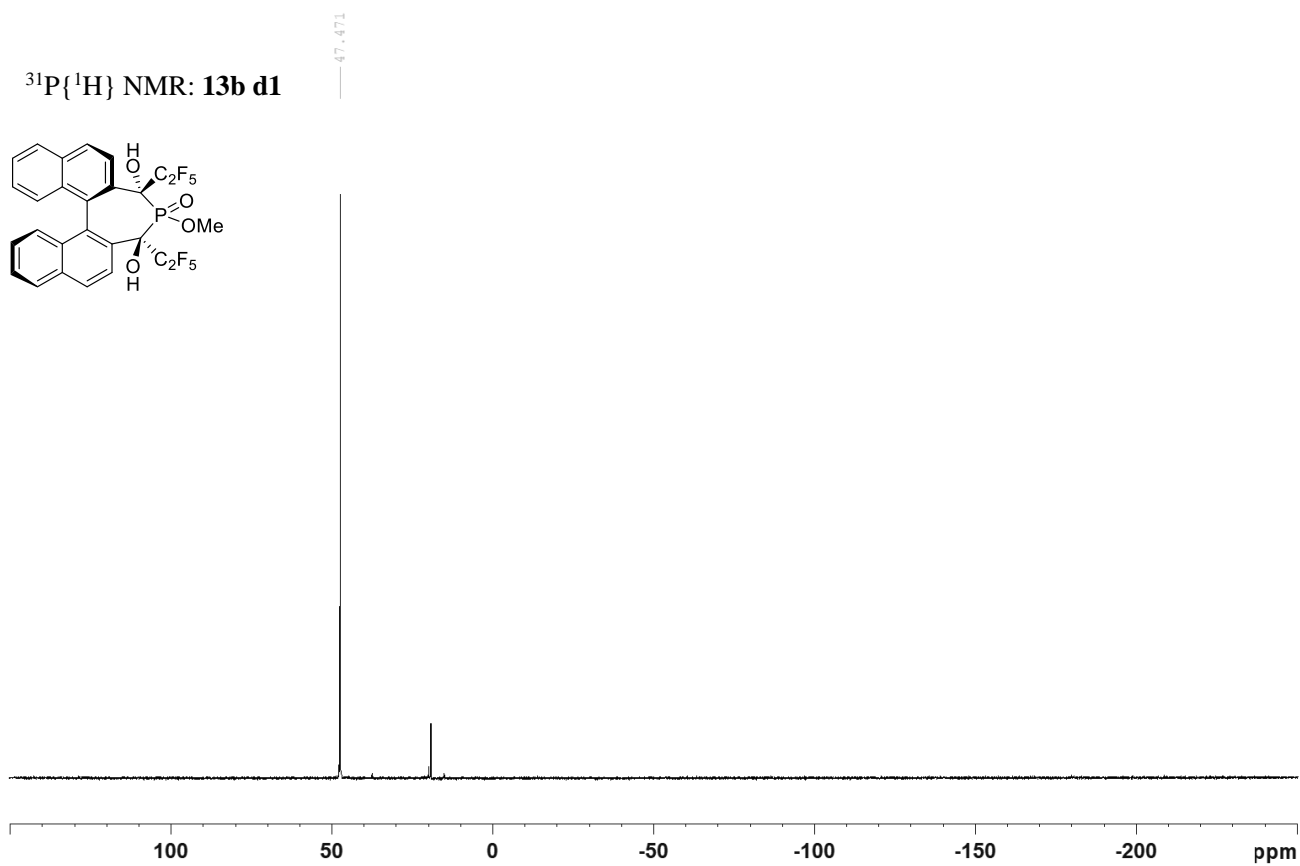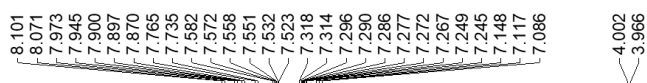

$^1\text{H}$  NMR: **16a**

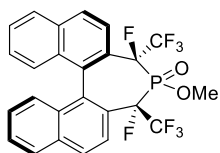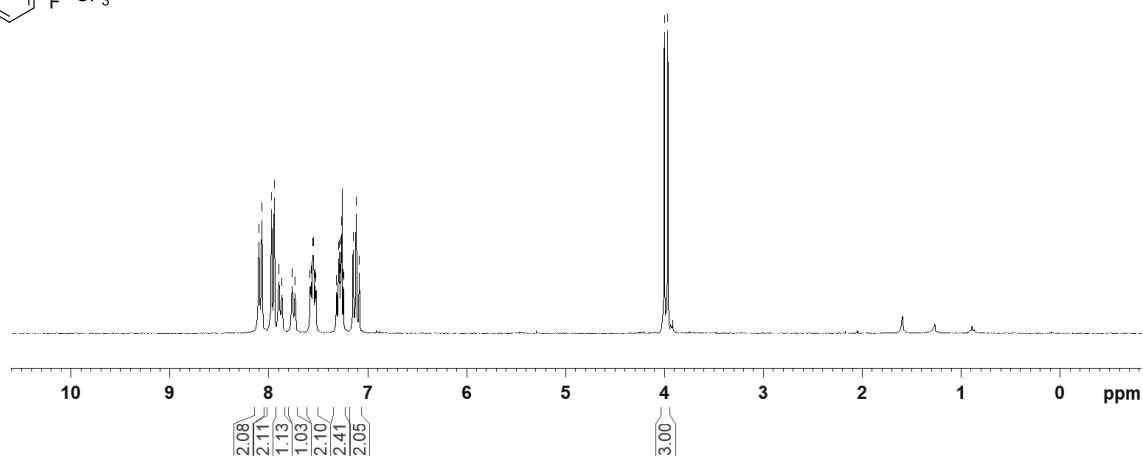

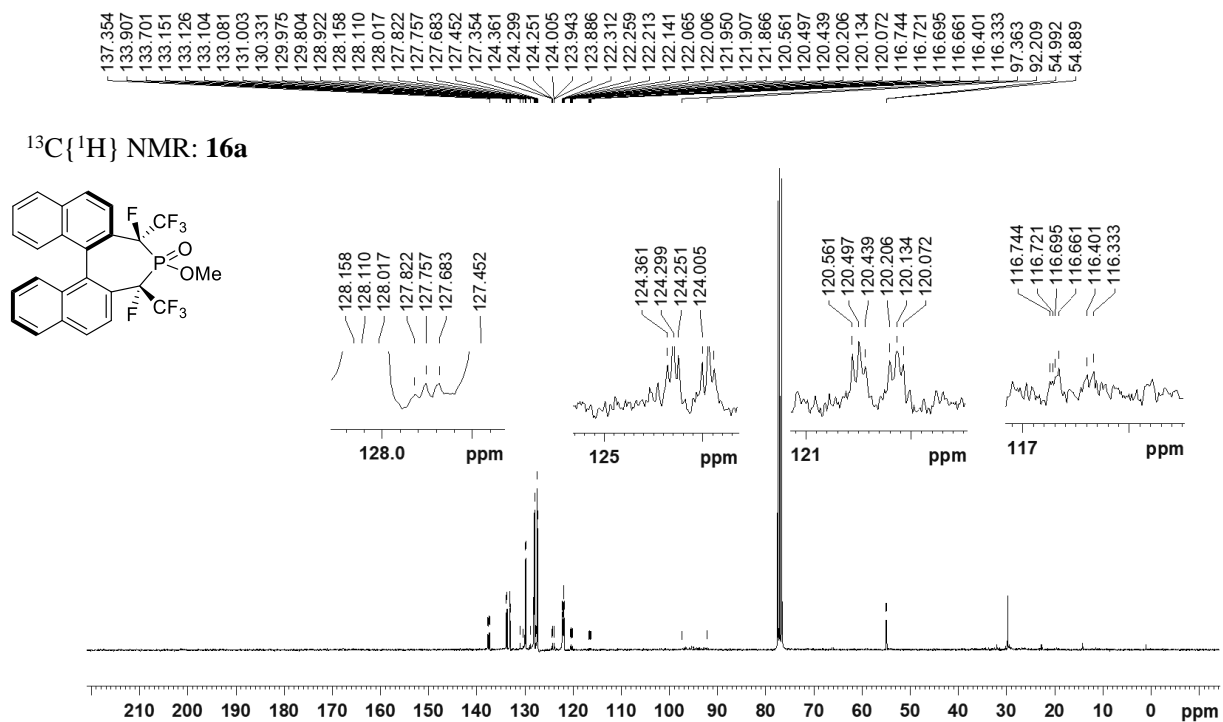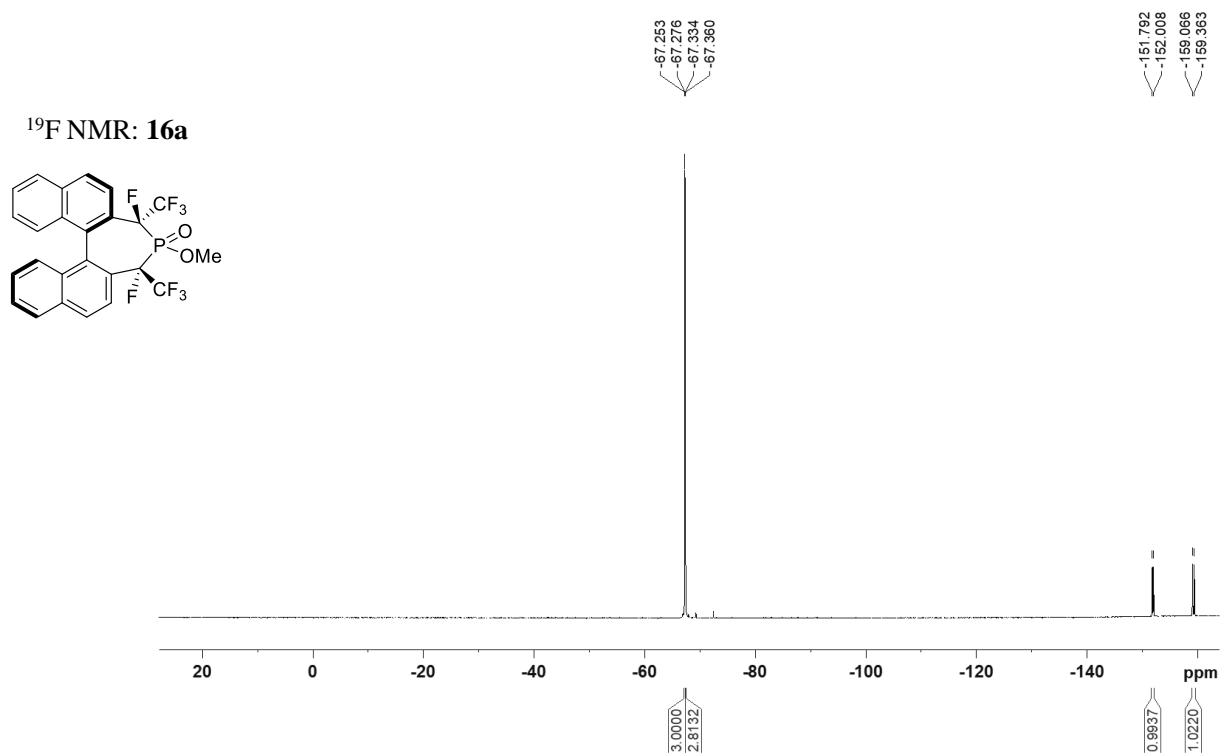

$^{31}\text{P}\{^1\text{H}\}$  NMR: **16a**

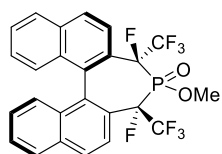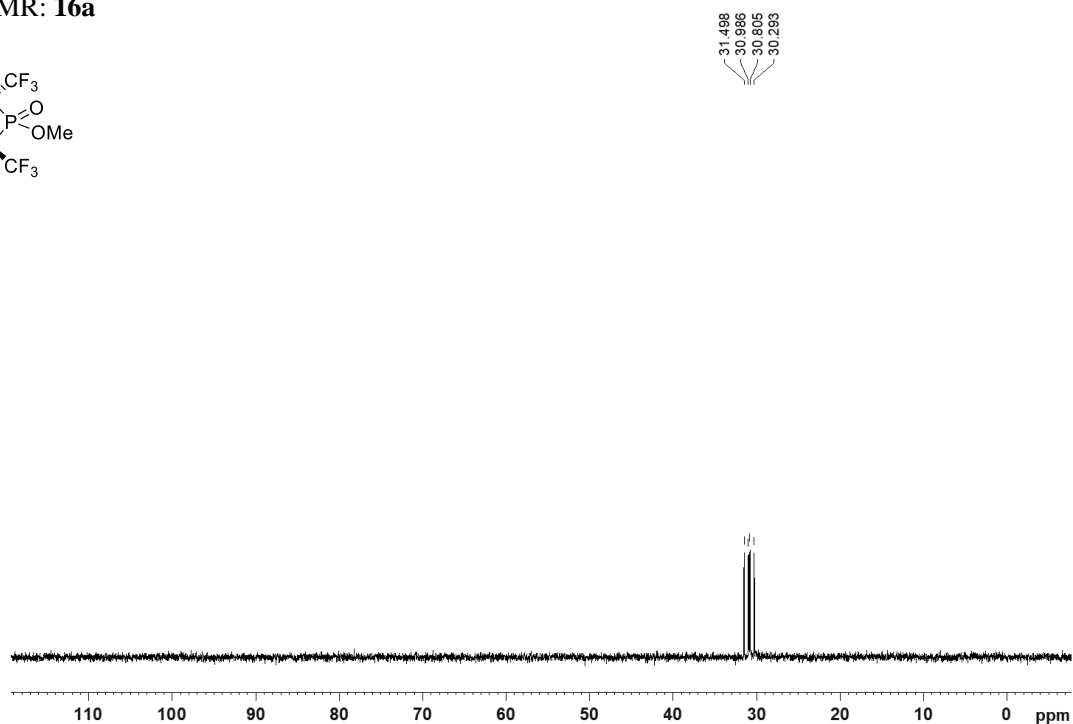

$^1\text{H}$  NMR: **16b**

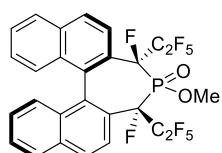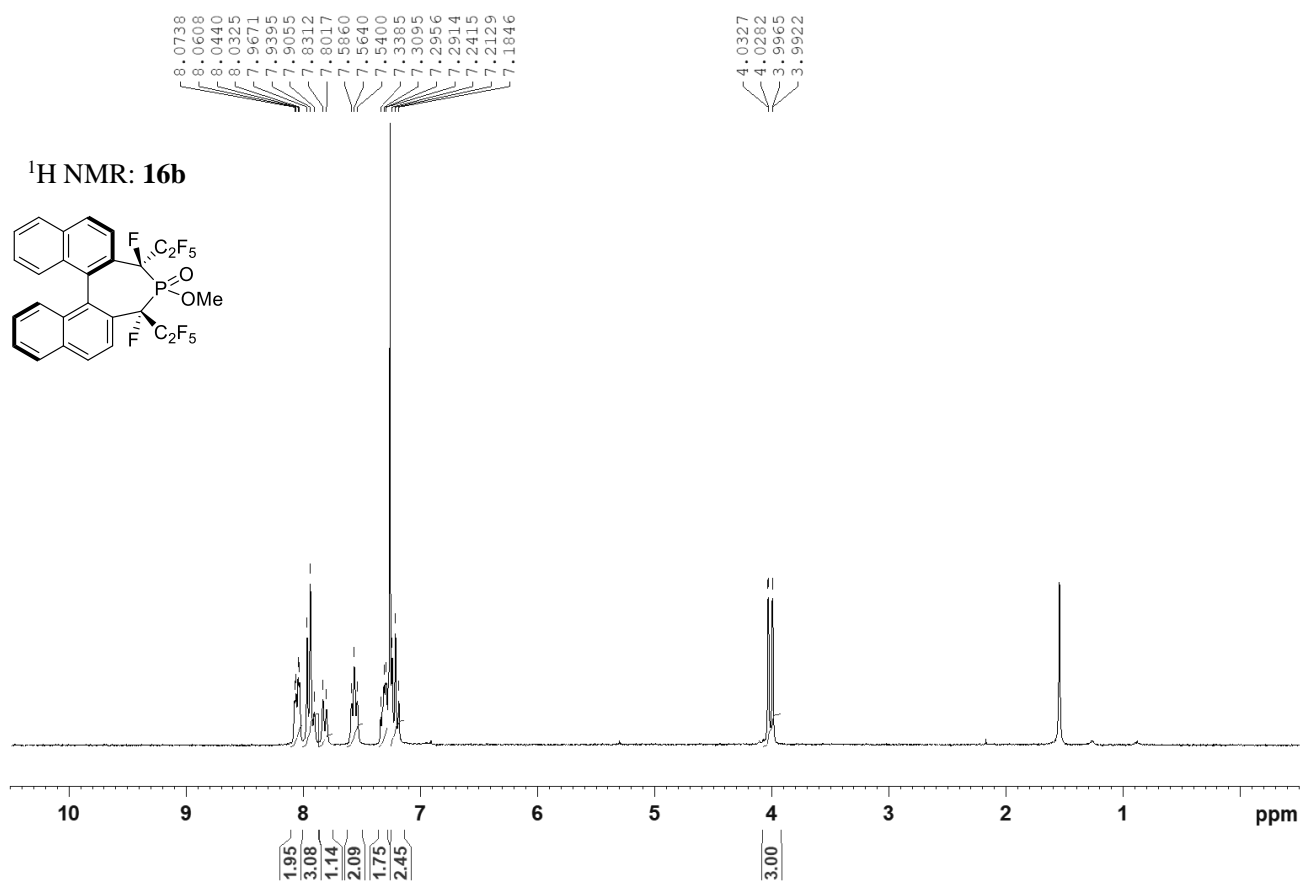

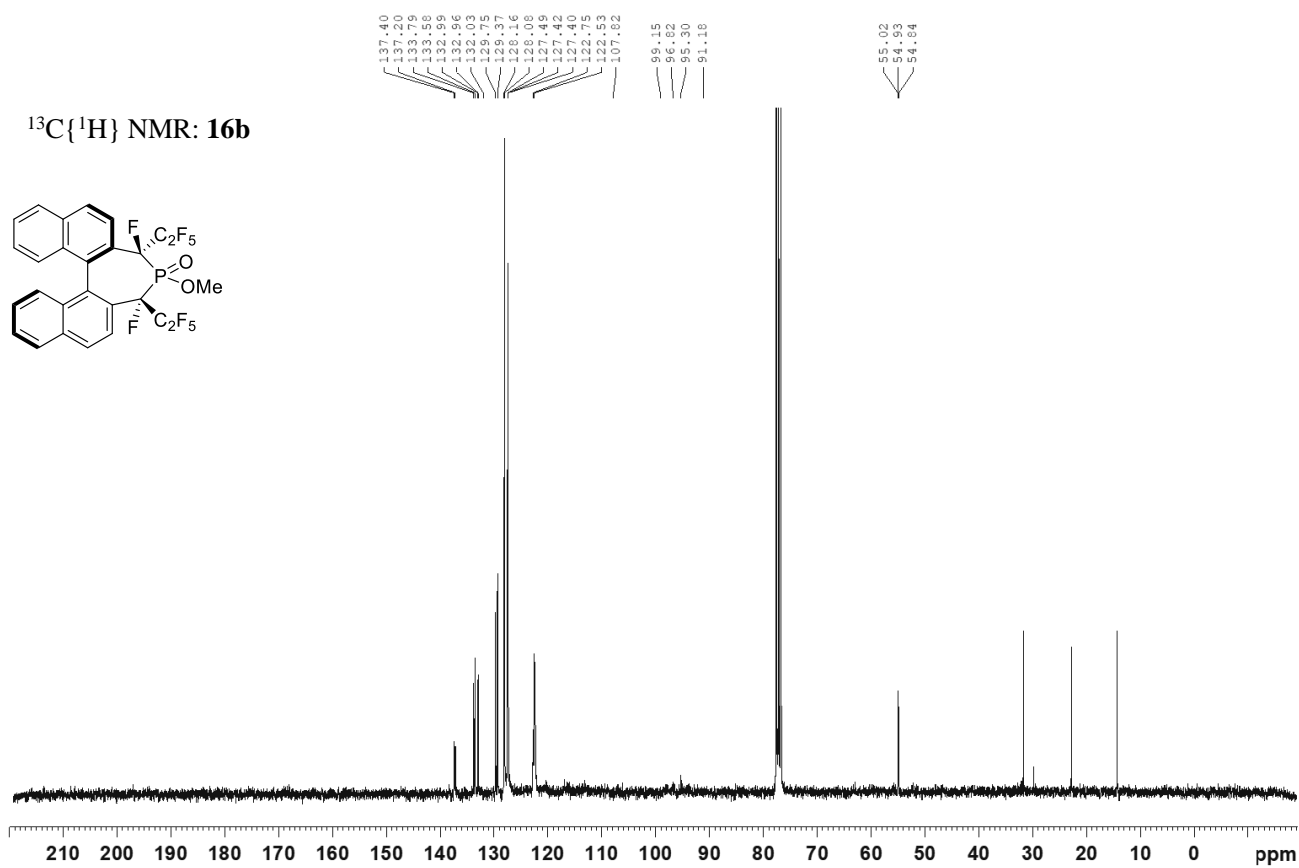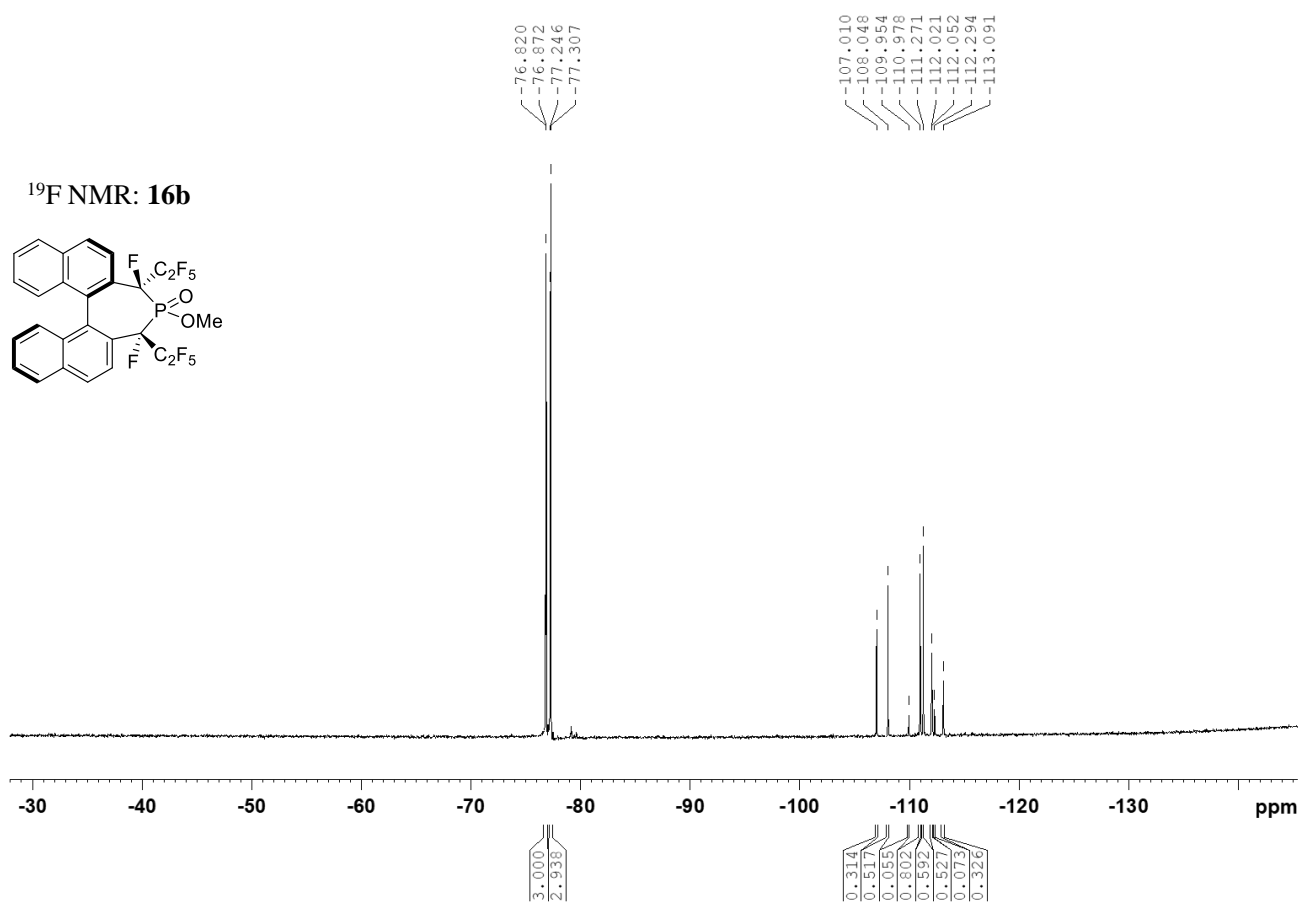

$^{31}\text{P}\{^1\text{H}\}$  NMR: **16b**

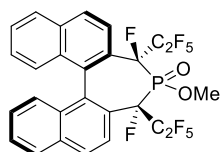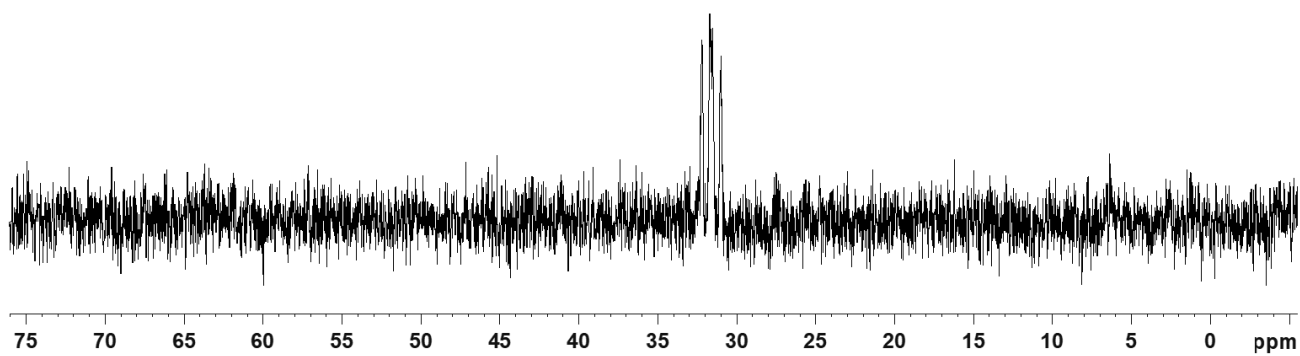

8.120  
8.090  
8.039  
8.012  
7.726  
7.697  
7.538  
7.514  
7.489  
7.303  
7.275  
7.252  
7.007  
6.979

$^1\text{H}$  NMR: **17a**

(DMSO- $d^6$ )

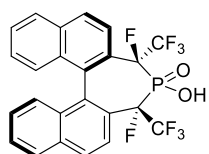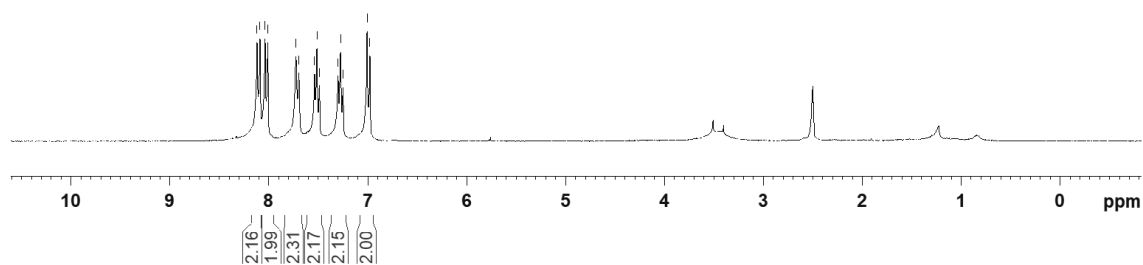

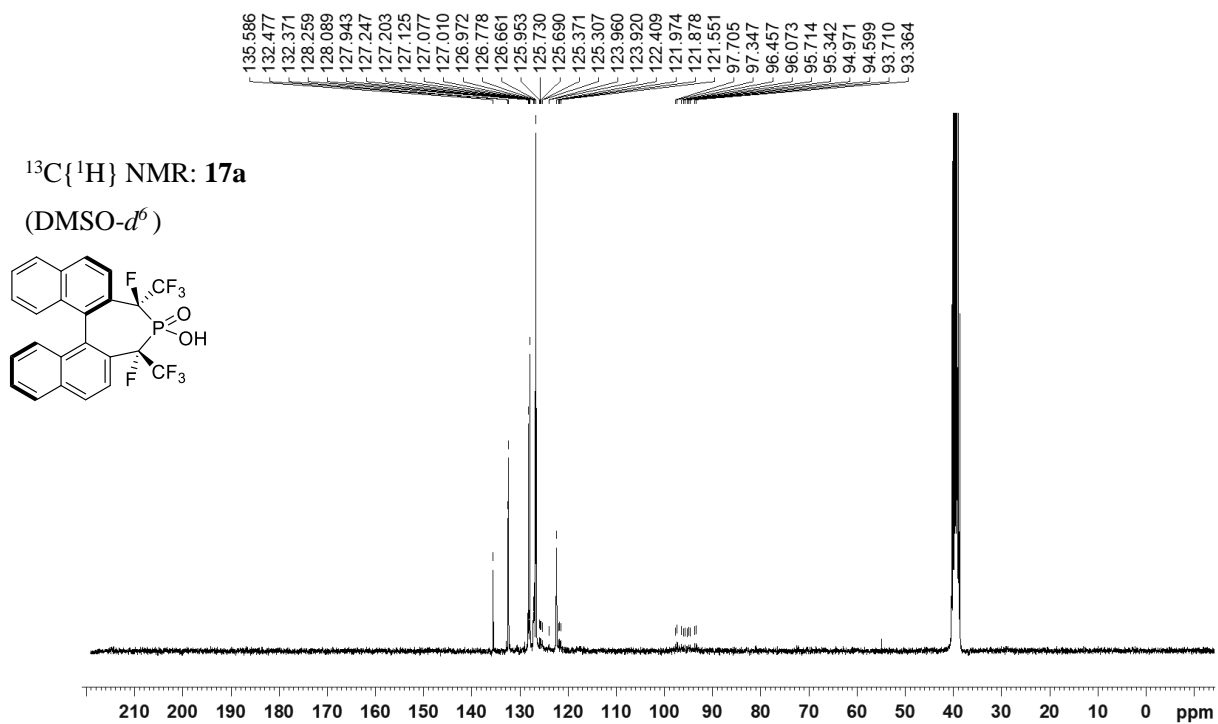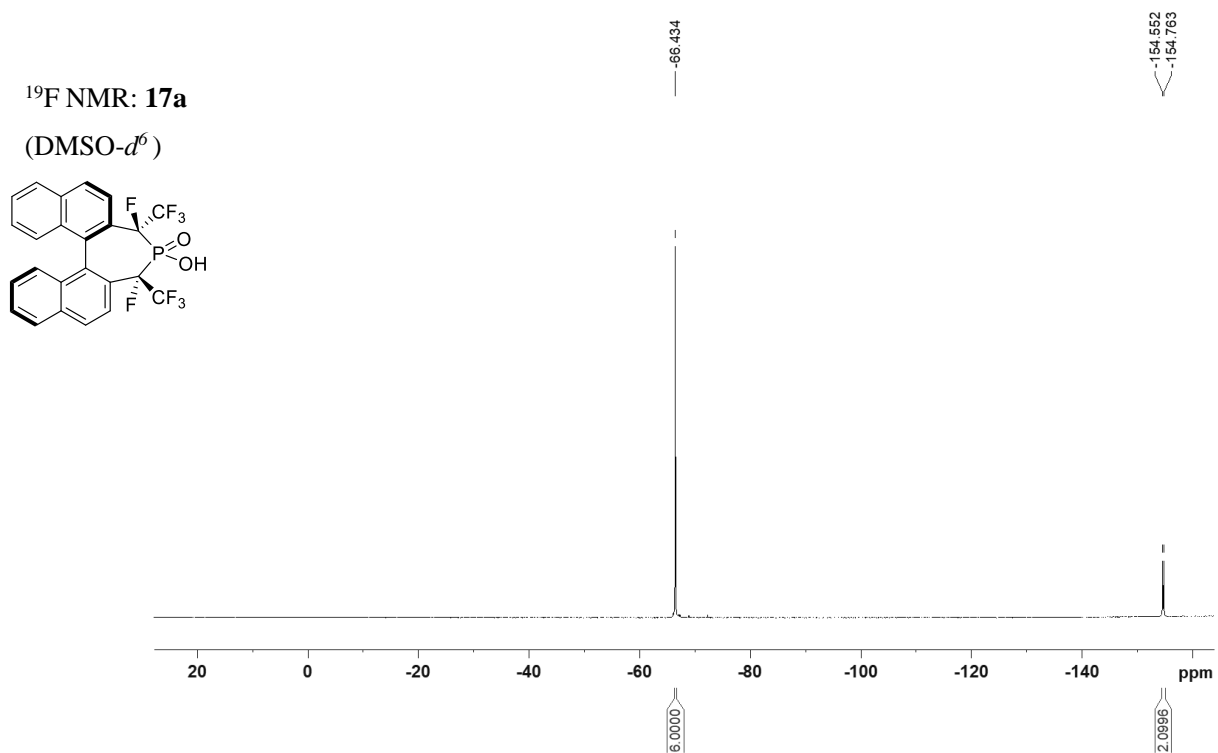

$^{31}\text{P}\{^1\text{H}\}$  NMR: **17a**

(DMSO- $d^6$ )

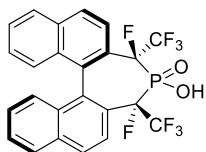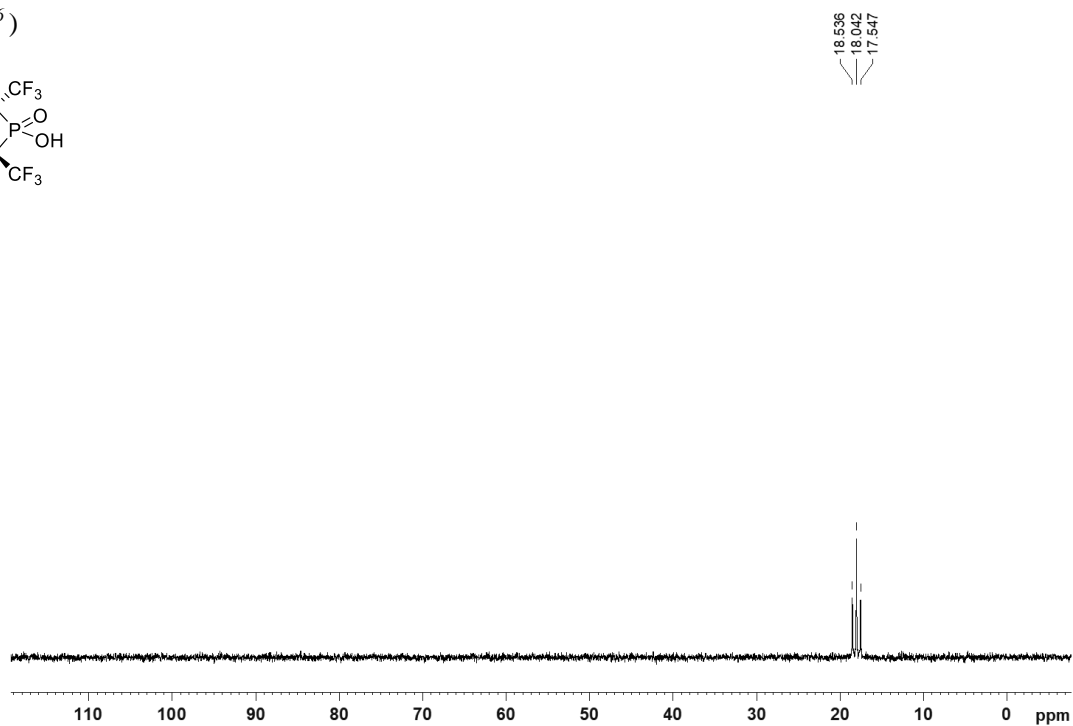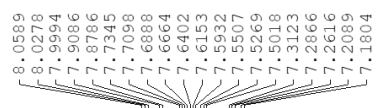

$^1\text{H}$  NMR: **17b**

(acetone- $d^6$ )

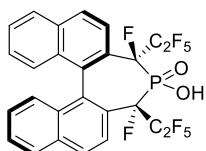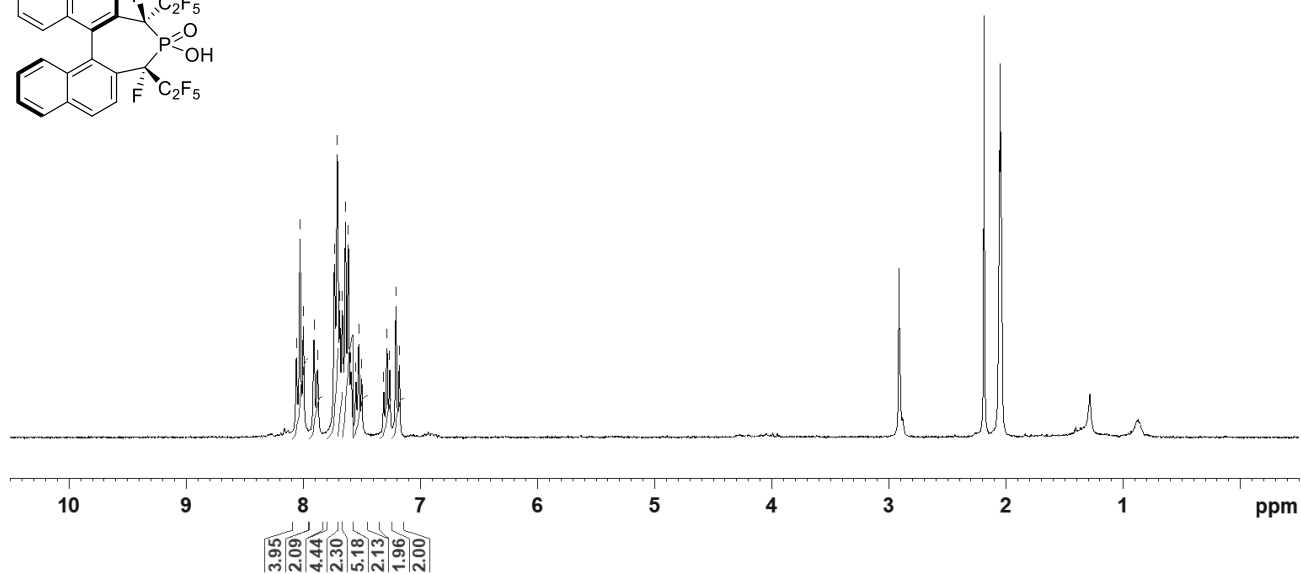

**$^{19}\text{F}$  NMR: **17b****

(acetone- $d^6$ )

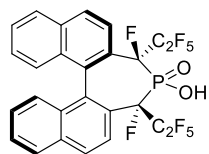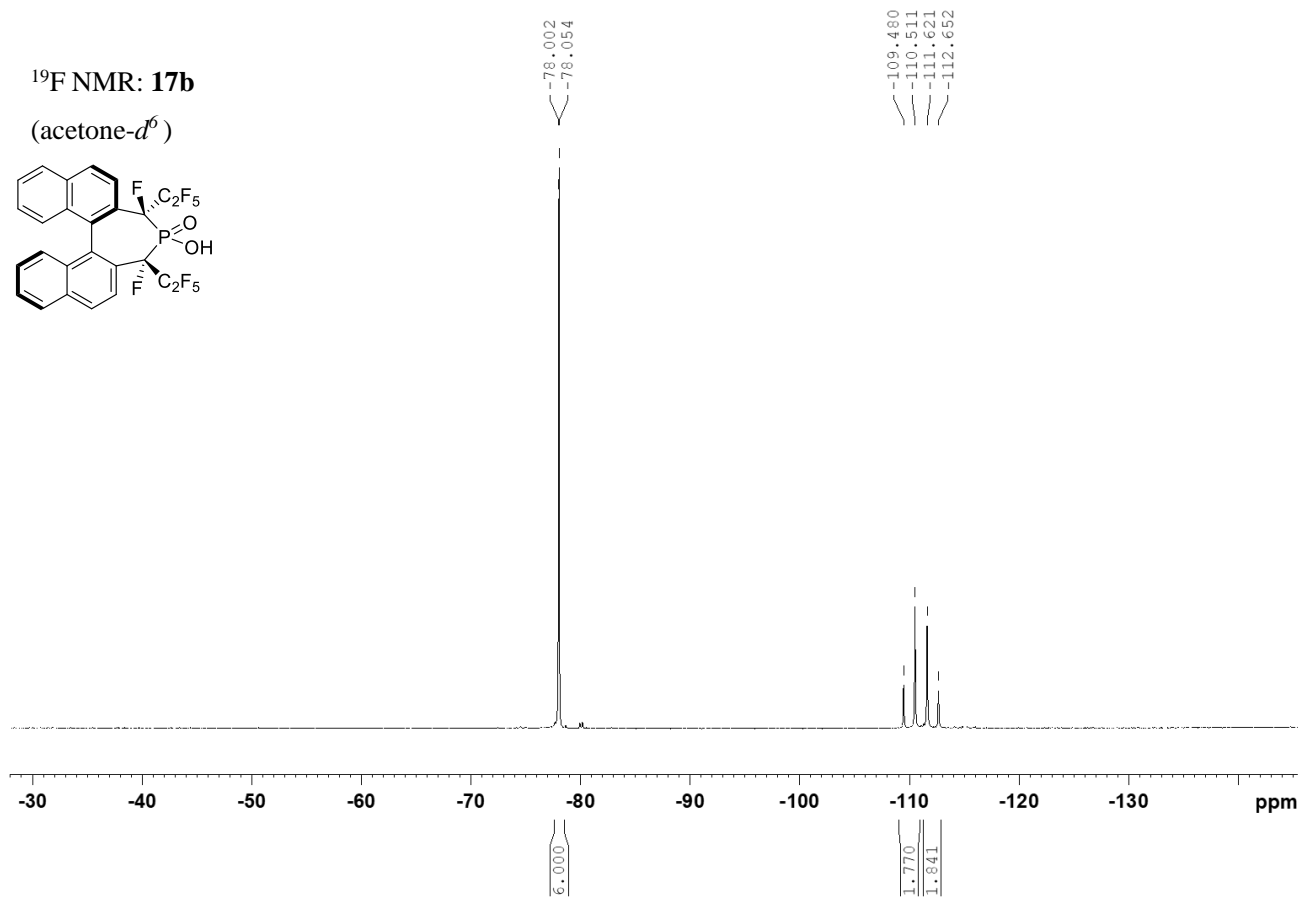

**$^{31}\text{P}\{^1\text{H}\}$  NMR: **17b****

(acetone- $d^6$ )

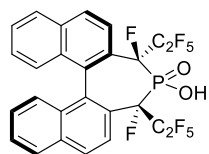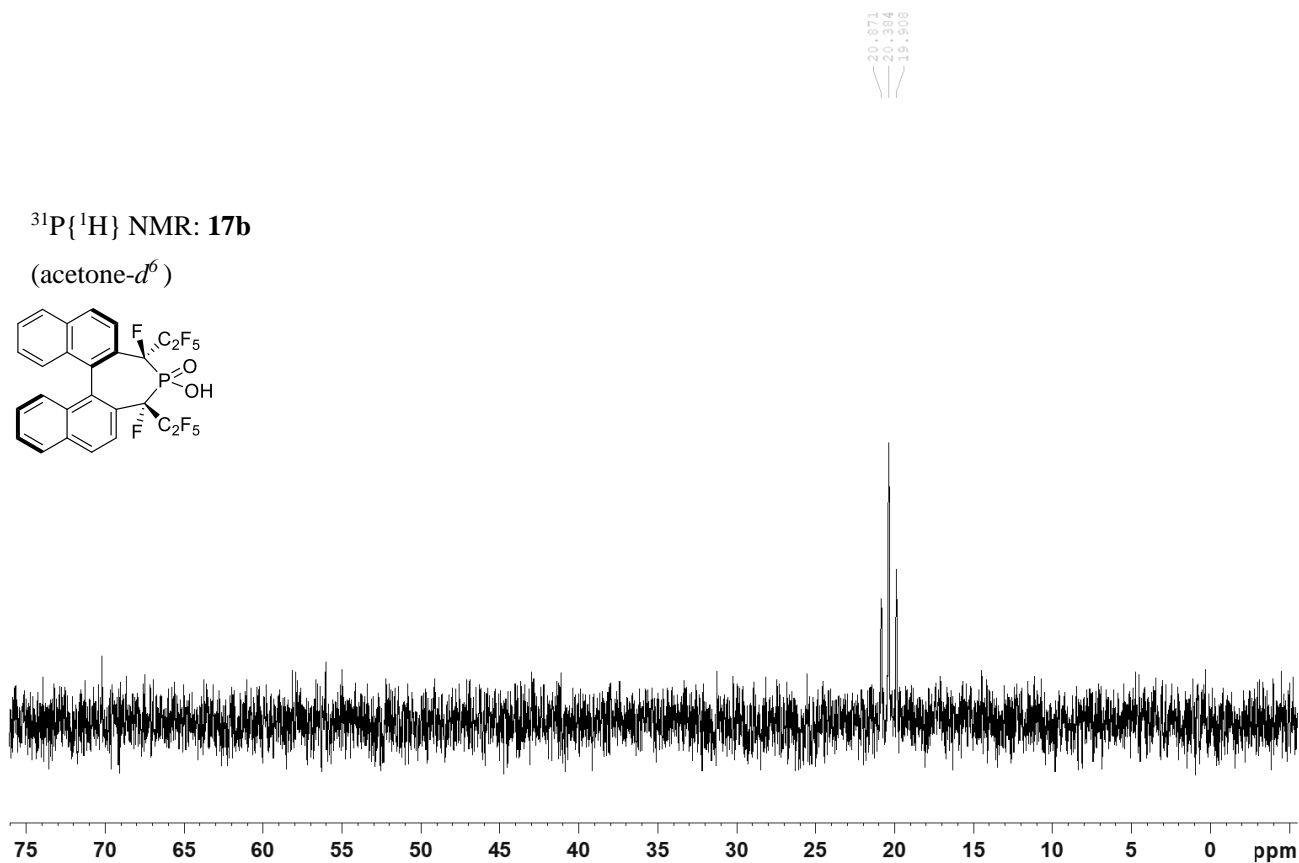



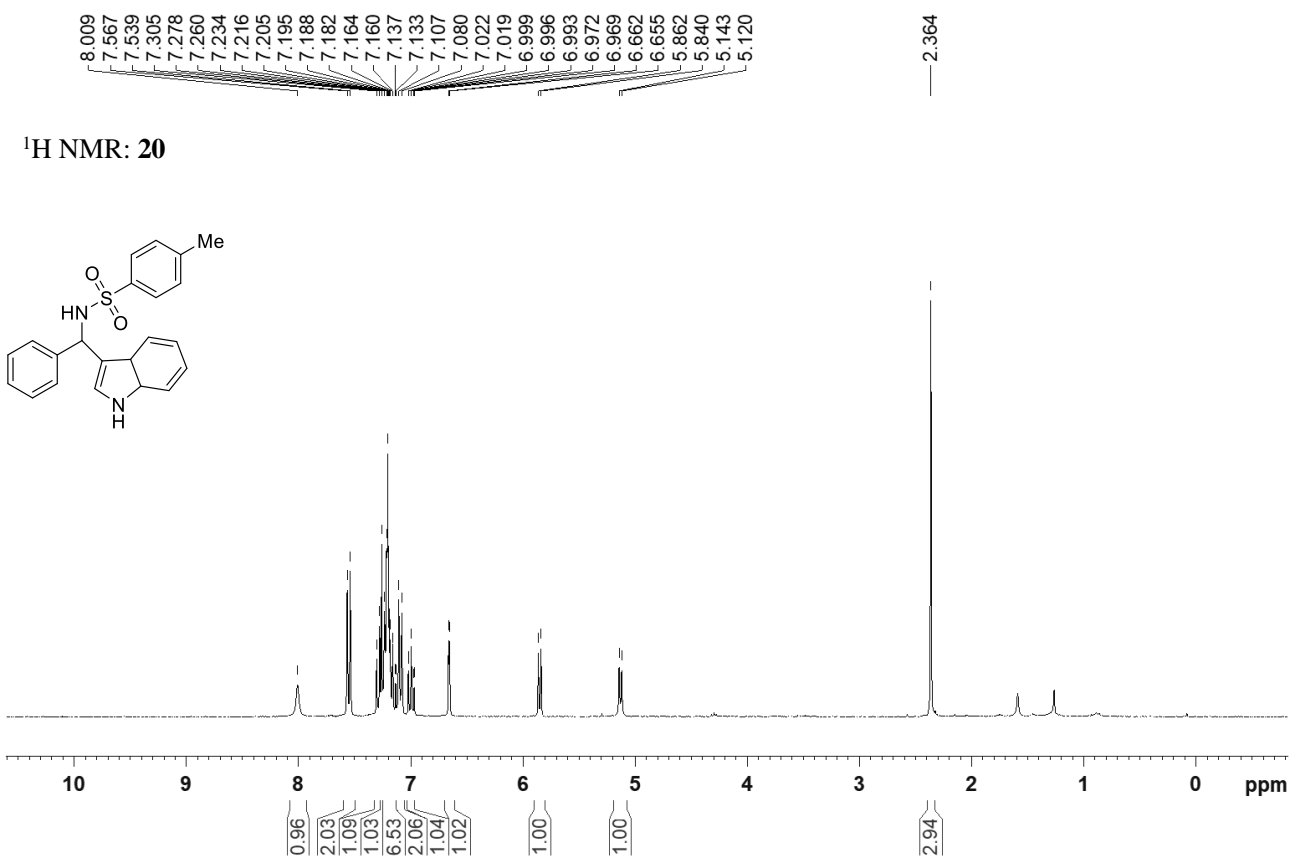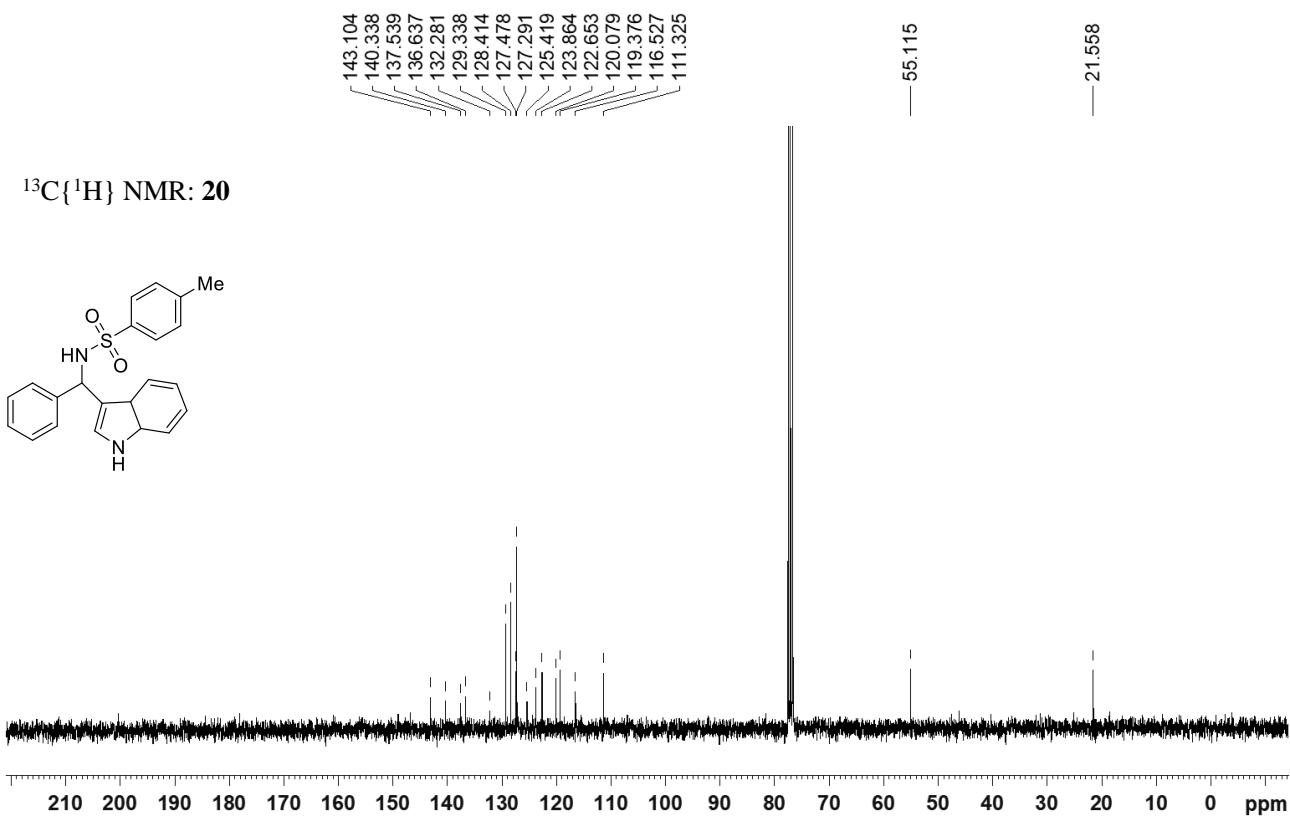

Supplement: Supplementary file 1 [file 14934608]
